# 1 **The pivotal role of the X-chromosome in the genetic architecture of the** 2 **human brain**

3  
4 **Running title: XWAS for the human brain**

5  
6 Zhiwen Jiang<sup>1</sup>, Patrick F. Sullivan<sup>2</sup>, Tengfei Li<sup>3,4</sup>, Bingxin Zhao<sup>5,6</sup>, Xifeng Wang<sup>1</sup>, Tianyou Luo<sup>1</sup>, Shuai  
7 Huang<sup>1</sup>, Peter Y. Guan<sup>1</sup>, Jie Chen<sup>1</sup>, Yue Yang<sup>1</sup>, Jason L. Stein<sup>2,7</sup>, Yun Li<sup>1,2,8</sup>, Dajiang Liu<sup>9,10</sup>, Lei Sun<sup>11,12</sup>,  
8 and Hongtu Zhu<sup>1,2,4,8,13\*</sup>

9  
10 <sup>1</sup>Department of Biostatistics, University of North Carolina at Chapel Hill, Chapel Hill, NC 27599, USA.

11 <sup>2</sup>Department of Genetics, University of North Carolina at Chapel Hill, Chapel Hill, NC 27599, USA.

12 <sup>3</sup>Department of Radiology, University of North Carolina at Chapel Hill, Chapel Hill, NC 27599, USA.

13 <sup>4</sup>Biomedical Research Imaging Center, School of Medicine, University of North Carolina at Chapel Hill, Chapel  
14 Hill, NC 27599, USA.

15 <sup>5</sup>Department of Statistics and Data Science, University of Pennsylvania, Philadelphia, PA 19104, USA.

16 <sup>6</sup>Department of Statistics, Purdue University, West Lafayette, IN 47907, USA.

17 <sup>7</sup>UNC Neuroscience Center, University of North Carolina at Chapel Hill, Chapel Hill, NC 27599, USA.

18 <sup>8</sup>Department of Computer Science, University of North Carolina at Chapel Hill, Chapel Hill, NC 27599, USA.

19 <sup>9</sup>Department of Public Health Sciences, Penn State University, Hershey, PA 17033, USA.

20 <sup>10</sup>Department of Biochemistry and Molecular Biology, Penn State University, Hershey, PA 17033, USA.

21 <sup>11</sup>Department of Statistical Sciences, University of Toronto, Toronto, ON M5G 1Z5, Canada.

22 <sup>12</sup>Division of Biostatistics, Dalla Lana School of Public Health, University of Toronto, Toronto, ON M5T 3M7,  
23 Canada.

24 <sup>13</sup>Department of Statistics and Operations Research, University of North Carolina at Chapel Hill, Chapel Hill, NC  
25 27599, USA.

26  
27 *\*Corresponding author:*

28 Hongtu Zhu

29 3105C McGavran-Greenberg Hall, 135 Dauer Drive, Chapel Hill, NC 27599.

30 E-mail address: [htzhu@email.unc.edu](mailto:htzhu@email.unc.edu) Phone: (919) 966-7250

1 **ABSTRACT**

2 Genes on the X-chromosome are extensively expressed in the human brain, resulting in substantial  
3 influences on brain development, intellectual disability, and other brain-related disorders. To  
4 comprehensively investigate the X-chromosome's impact on the cerebral cortex, white matter tract  
5 microstructures, and intrinsic and extrinsic brain functions, we examined 2,822 complex brain imaging  
6 traits obtained from n = 34,000 subjects in the UK Biobank. We unveiled potential autosome-X-  
7 chromosome interaction, while proposing an atlas of dosage compensation (DC) for each set of traits. We  
8 observed a pronounced X-chromosome impact on the corticospinal tract and the functional amplitude and  
9 connectivity of visual networks. In association studies, we identified 50 genome-wide significant trait-  
10 locus pairs enriched in Xq28, 22 of which replicated in independent datasets (n = 4,900). Notably, 13  
11 newly identified pairs were in the X-chromosome's non-pseudo-autosomal regions (NPR). The volume of  
12 the right ventral diencephalon shared genetic architecture with schizophrenia and educational attainment  
13 in a locus indexed by rs2361468 (located ~3kb upstream of *PJAI*, a conserved and ubiquitously expressed  
14 gene implicated in multiple psychiatric disorders). No significant associations were identified in the  
15 pseudo-autosomal regions (PAR) or the Y-chromosome. Finally, we explored sex-specific associations on  
16 the X-chromosome and compared differing genetic effects between sexes. We found much more  
17 associations can be identified in males (33 versus 9) given a similar sample size. In conclusion, our  
18 research provides invaluable insights into the X-chromosome's role in the human brain, contributing to  
19 the observed sex differences in brain structure and function.

20

21 **KEYWORDS:** X-chromosome; UK Biobank; Dosage compensation; Brain disorders; Sex differences;  
22 Genetic architecture

1 The genetic foundations governing gene regulation on the X-chromosome are inherently complex due to  
2 the XY sex-determination system<sup>1</sup>. In genetic females, who possess two X-chromosomes compared to  
3 males' one, an X-chromosome is silenced, either at random or with a bias toward a particular parental  
4 copy, to equalize the transcriptional dosages of X-linked genes between the sexes<sup>2,3</sup>. This process, termed  
5 dosage compensation (DC) or X-chromosome inactivation (XCI), ensures that every female becomes a  
6 cellular mosaic, with each cell containing one of the two possible active X-chromosomes<sup>4</sup>. However, DC  
7 is not absolute. Only about 60-75% of X-linked genes undergo full silencing<sup>5</sup>, and the process can be  
8 tissue-specific<sup>6,7</sup>. Consequently, several factors, such as DC itself and individual variances in the  
9 expression of parent-of-origin genes, can influence female X-linked gene expression<sup>8</sup>. While most  
10 somatic cells in both sexes have only one active X-chromosome, the expression levels of genes on the X-  
11 chromosome can be amplified to match the expression levels of autosomal genes<sup>9</sup> (Ohno's hypothesis).  
12 This compensatory elevation in the expression of X-linked genes has been noted across several species,  
13 including human<sup>10</sup> and mouse<sup>10-12</sup>, and other species<sup>10</sup>.

14  
15 The X-chromosome is home to a wealth of genes predominantly expressed in brain tissues<sup>10,13</sup> as the  
16 chromosome-X to autosome expression ratio exceeds one<sup>10</sup>, underscoring the pronounced influence of the  
17 X-chromosome on brain anatomy, connection, and functions<sup>14-17</sup>. Mounting evidence has shown that the  
18 X-chromosome significantly impacts a myriad of neurological diseases and psychiatric disorders from  
19 both genetic and epigenetic viewpoints<sup>5,18-20</sup>. For instance, X-linked intellectual disability is a well-studied  
20 brain disorder and by 2022, 162 associated genes have been identified<sup>21</sup>. Remarkably, the concentration of  
21 genes on the X-chromosome is double that of intellectual disability-associated genes on the autosomes<sup>21</sup>.  
22 Chromosome mutations, such as sex chromosome aneuploidy, can have profound implications on brain  
23 structures<sup>14,22</sup>, cognitive capacities<sup>23,24</sup>, behaviors<sup>24</sup>, and both neurological<sup>24,25</sup> and psychiatric  
24 disorders<sup>26,27</sup>. A combination of factors – including the dense presence of associated genes, varying gene  
25 expression between sexes, and the influence of epigenetic processes steered by sex steroid hormones –  
26 establishes the X-chromosome as a nexus for sex differences in the human brain across various age  
27 groups<sup>4,7,8,28-33</sup>. However, in spite of its pivotal role, the X-chromosome frequently goes unnoticed in  
28 genome-wide association studies (GWAS), as discussed by Wise et al.<sup>34</sup> and Sun. et al.<sup>35</sup>.

29  
30 In prior research, Smith et al.<sup>17</sup> conducted a GWAS for 3,144 complex brain imaging traits (n = 22,138)  
31 and identified four genome-wide significant loci on the X-chromosome with the top SNP from each locus  
32 registering a p-value  $< 7.94 \times 10^{-12}$ . They also characterized the genetic loci using eQTLs and examined  
33 the genetic co-architectures between brain traits and health-related disorders. Mallard et al.<sup>16</sup> focused on  
34 investigating DC for regional brain measurements, including cortical volumes (CVs), cortical thickness

1 (CT), and surface area (SA). They first observed a notable enrichment of X-chromosome influences on  
2 several regions of interest (ROIs) related to SA and then explored the genetic underpinnings of these  
3 ROIs through an X-chromosome-wide association study (XWAS<sup>36</sup>). However, the study of Smith et al.<sup>17</sup>  
4 used a smaller discovery sample size ( $n = 22,138$ ) than is currently available and the work of Mallard et  
5 al.<sup>16</sup> was limited to brain anatomy. What is more crucial is that there remains a significant knowledge gap  
6 regarding the DC profile for brain imaging traits, as well as the extent to which sex differences in the  
7 human brain are influenced by the X-chromosome.

8  
9 An overview of the present study is depicted in **Fig. 1**. We amassed 2,822 complex brain imaging traits  
10 derived from structural magnetic resonance imaging (sMRI) for cortical and subcortical structures of gray  
11 matter, diffusion MRI (dMRI) for microstructures of white matter tracts, resting-state functional MRI  
12 (rfMRI) and task-evoked functional MRI (tfMRI) for intrinsic and extrinsic brain functions, respectively  
13 (**Table S1**). Specifically, sMRI traits include BV, CT, and SA; dMRI traits include axial diffusivity  
14 (AD), fractional anisotropy (FA), mean diffusivity (MD), mode of anisotropy (MO), and radial diffusivity  
15 (RD) along tracts and their tract-mean and functional principal component (PC) traits (hereafter DTI  
16 traits); and rfMRI and tfMRI traits generated using the Glasser360<sup>37</sup> atlas (hereafter G360 traits).  
17 Additionally, rfMRI images were subjected to whole-brain spatial independent component analysis (ICA,  
18 hereafter ICA traits). More details are in the Methods. A brief introduction and annotation of the DTI and  
19 ICA traits can be found in **Table S1**. The robustness and reproducibility of all trait measurements have  
20 been established in our previous studies<sup>38-41</sup>.

21  
22 We first meticulously assessed the DC status of each trait using model selection, while gauging the  
23 narrow-sense heritability tied to the NPR SNPs of the X-chromosome by using a sex-agnostic analysis  
24 (**Fig. 1**). We then created a detailed DC atlas for every trait cluster. In association analysis, we tested the  
25 NPR and PAR SNPs on the X-chromosome, in addition to the SNPs on the Y-chromosome. By  
26 implementing the optimal DC model for the NPR SNPs, we aimed to enhance our statistical accuracy.  
27 Interestingly, our brain imaging traits showed genetic overlaps with both brain-related disorders and  
28 educational benchmarks. Our further analyses probed into sex differences, focusing on facets like  
29 heritability, variance in phenotype, genetic associations, and genetic impact. These findings offer  
30 invaluable insights into the genetic factors influencing sex-based differences in the human brain's  
31 structure and functions. With this research, our goal is to deepen the understanding of the X-  
32 chromosome's role in human brain function and development. Our findings will pave the way for  
33 enriching future endeavors in biology, clinical sciences, and psychiatry.

34

## 1 RESULTS

### 2 Dosage compensation in the X-chromosome

3 We inferred a global DC status for each trait through model selection. Specifically, we employed three  
4 different model specifications: full DC, no DC, and equal variance to jointly estimate the narrow-sense  
5 heritability ascribed to autosomes ( $h_a^2$ ) and the heritability credited to the NPR on the X-chromosome  
6 ( $h_x^2$ ) using GCTA<sup>42</sup> (Methods). In these models, females were always coded as {0, 1, 2}, but males were  
7 coded as {0, 2} for full DC (known as random X-inactivation<sup>43</sup>), {0, 1} for no DC, {0,  $\sqrt{2}$ } for equal  
8 variance. These models illustrate the differing genetic variance between sexes, as males have twice the  
9 genetic variance as much as females in full DC, half in no DC, and identical in the equal variance model.  
10 For each trait, the model exhibiting the lowest Akaike information criterion (AIC) was selected as the best  
11 model. The DC status inferred in this way is not gene-specific but theoretically matches the DC based on  
12 the aggregated association statistics on the X-chromosome. Since the heritability attributable to the X-  
13 chromosome hinges on the inactivation status of the X-linked loci affecting a trait<sup>42,44</sup>, we can estimate the  
14 X-linked heritability more accurately and enhance the statistical power of our association analysis by  
15 designating the DC status for each trait. For clarity in subsequent discussions, we did not distinguish  $h_x^2$   
16 ( $h_a^2$ ) from their sample estimates  $\widehat{h}_x^2$  ( $\widehat{h}_a^2$ ) if there was no confusion.

17  
18 Out of the 2,822 traits analyzed, 2,810 exhibited a total heritability ( $h_a^2 + h_x^2$ ) that was positive, revealing  
19 that 69.4% favored full DC, 22.6% favored no DC, and 7.97% favored equal variance. **Fig. 2A** shows the  
20 distribution of DC status for each trait set (see **Table S2** for detail). The traits MO, CT<sup>16</sup>, and ICA had the  
21 highest percentage of no DC preference. For the traits leaning towards full DC, no DC, and equal  
22 variance, the average  $h_x^2$  estimates of 0.672% (se = 0.315%), 0.938% (se = 0.581%) and 0.250% (se =  
23 0.417%), respectively (**Fig. 2B**). The differences in average  $h_x^2$  across the three DC groups were  
24 statistically significant (Wilcoxon rank sum test, pairwise p-values  $< 5.5 \times 10^{-14}$ ). Higher  $h_x^2$  estimates  
25 are reasonable for traits favoring the no DC because when the cumulative gene expression dosage  
26 amplifies due to the evasion from XCI, the X-chromosome assumes a more dominant role in genetic  
27 regulation.

28  
29 Our analysis revealed that traits favoring full DC on the X-chromosome exhibited a stronger autosomal  
30 heritability compared to those favoring the alternative DC models (Wilcoxon rank sum test, pairwise p-  
31 values  $< 0.005$ , **Fig. 2C**). Specifically, traits with full DC exhibited an average heritability  $h_a^2 = 20.0\%$ .  
32 In comparison, no DC traits showed  $h_a^2 = 15.4\%$ , and equal variance traits showed  $h_a^2 = 12.6\%$ . This  
33 distinction was not caused by estimation bias, since for any given trait,  $h_a^2$  estimated in different DC

1 models were consistent (**Fig. S1**). The observed differentiation suggests a potential autosome-X-  
2 chromosome interaction, such as DNA methylation on autosomes which is *trans* regulated by the X-  
3 chromosome<sup>45</sup>. Concurrently, we theorize that traits aligned with no DC and equal variance models might  
4 be more influenced by non-genetic contributors, such as environmental factors.

5  
6 Under the equal variance model, the ratio of  $h_X^2$  for a trait between males and females, denoted as  $\rho_X =$   
7  $\frac{h_{X,male}^2}{h_{X,female}^2}$ , should be two for traits favoring full DC and 0.5 for those favoring no DC. To verify whether  
8 the inferred DC aligned with this assumption, we estimated sex-specific heritability for each trait, then  
9 calculated  $\rho_X$  (Methods). We observed that,  $\rho_X=1.94, 0.874, \text{ and } 1.16$  for traits favoring full DC, no DC,  
10 and equal variance, respectively (**Fig. S2A**). We further compared the heritability ratios stratified by sex  
11 for autosomes, denoted as  $\rho_a = \frac{h_{a,male}^2}{h_{a,female}^2}$ , across traits based on their respective DC models for the X-  
12 chromosome. The observed differences among the three DC models were minor:  $\rho_a=0.983$  for full DC,  
13  $\rho_a=1.01$  for no DC and  $\rho_a=1.01$  for equal variance, all close to the expected value of one (**Fig. S2B**).  
14 Among these, only the X estimate for no DC notably strayed from the expected value (z-test p-values >  
15 0.05/6). This implies that our model selection strategy is generally effective in identifying the appropriate  
16 model. The higher-than-expected value of X in the no DC category (when compared to 0.5) could  
17 potentially arise from classification errors and biological heterogeneity, such as variations in sex hormone  
18 levels<sup>4,44</sup>.

## 20 **Patterns of dosage compensation and X-linked heritability for complex brain imaging traits**

21 We jointly estimated  $h_a^2$  and  $h_X^2$  via the GREML analysis of GCTA<sup>42</sup> based on the optimal DC model for  
22 each trait. Of the 2,810 traits with non-zero total heritability ( $h_a^2 + h_X^2 > 0$ ), 1,118 (39.8%) traits  
23 displayed significant heritability with an average of  $h_X^2 = 1.27\%$  (se = 0.406%) after adjusting for  
24 multiple comparisons by controlling false discovery rate (FDR) at the 0.05 level (**Fig. 2D-F and Table**  
25 **S2**). The majority of BV and SA traits were significant, succeeded by DTI tract-mean traits and rfMRI  
26 G360 traits. In contrast, CT and rfMRI ICA showcased the fewest traits with notable heritability  
27 estimates.

28  
29 In the sex-stratified analysis, a larger number of traits demonstrated significant  $h_X^2$  for males compared to  
30 females (**Fig. S3-4 and Table S3**). We then assessed the relative contribution of the X-chromosome to  
31 the total heritability, denoted as  $\frac{h_X^2}{h_a^2+h_X^2}$  (**Fig. S5A**). Generally, the X-chromosome was pivotal in  
32 accounting for genetic variance, especially for fMRI traits, with values ranging between 4.68% and

1 5.99%. Additionally, we evaluated the enrichment of  $h_X^2$  by contrasting the observed  $h_X^2$  with the expected  
2 ones. The expected  $h_X^2$  represents heritability attributed to a genome segment of a comparable size  
3 (Methods). Out of all the traits, 45 (1.60%) displayed enriched  $h_X^2$ , while a substantial number of traits  
4 (476, 16.9%) exhibited depletion in  $h_X^2$  (**Fig. S5C-E and Table S2**). The remaining traits did not  
5 demonstrate any significant deviation. Groups with different enrichment levels displayed varied mean  $h_X^2$   
6 (**Fig. S5B**), with Wilcoxon rank sum test yielding pairwise p-values  $< 1.68 \times 10^{-11}$ . The limited  
7 presence of traits with enriched  $h_X^2$  can be traced back to male haploidy and random XCI observed in  
8 females<sup>44</sup>, as both factors reduce the genetic variance attributed to the X-chromosome.

9  
10 Differences were observed in patterns of DC across measures of brain anatomy. All SA traits favored full  
11 DC, while all but one BV trait (specifically the optic chiasm) also favored full DC. Contrastingly, about  
12 half of CT traits leaned towards either no DC or exhibited equal variance. While the mean CT favored full  
13 DC, those favoring no DC were spread across numerous cortical regions (**Fig. 3A**). Previous research has  
14 suggested that the CT of the motor cortex may be influenced by genes that escape typical regulations<sup>46</sup>.  
15 Our findings support this, as the CT for both the precentral and postcentral cortex (located near the motor  
16 cortex) showed patterns consistent with no DC.

17  
18 The X-chromosome significantly impacts variations in brain anatomy. Of the 230 traits examined, 179  
19 showed notable  $h_X^2$  estimates with average  $h_X^2 = 1.71\%$  ( $se = 0.379\%$ ). Our  $h_X^2$  and  $h_a^2$  estimates for  
20 global brain measures echoed findings from previous studies<sup>16,38,47,48</sup>. We observed no significantly  
21 enriched traits for BV, but we identified one for CT (left caudal middle frontal) and three for SA (left  
22 banks of superior temporal sulcus, left rostral middle frontal, and right pars triangularis) (**Fig. S6**).  
23 Notably, the left caudal middle frontal showcased the highest X-chromosome heritability in CT ( $h_X^2 =$   
24  $3.07\%$ ), where the X-chromosome accounted for over 14% of total heritability. There are distinct  
25 differences in  $h_X^2$  between CT traits and those of BV and SA. Firstly, the mean  $h_X^2$  for BV and SA are  
26 double that of CT. Secondly, although the correlations of  $h_a^2$  for traits in left and right hemispheres were  
27 comparable among BV, CT, and SA,  $h_X^2$  showed the highest correlation for BV ( $r = 0.807$ , p-value =  
28  $2.05 \times 10^{-11}$ ), then SA ( $r = 0.585$ , p-value = 0.0003) and lastly CT ( $r = 0.204$ , p-value = 0.20) (**Fig.**  
29 **S7**), given the standard errors of  $h_X^2$  estimates were similar among brain anatomy ( $se =$   
30  $0.362\% \sim 0.403\%$ ). Overall, the X-chromosome has a pronounced effect on BV and SA, but its influence  
31 on CT varies more between hemispheres, and the DC pattern of CT is more intricate. This suggests that  
32 CT undergoes unique biological processes during brain development compared to BV and SA<sup>30,49</sup>.

33



1 White matter tracts evaluated by MO predominantly favored no DC, whereas RD had the highest  
2 proportion of full DC traits (**Fig. 3B** for the DC alas of MO and **Fig. S8** for other metrics). The DC  
3 patterns in the PCs of MO differed significantly from other metrics: MO displayed 51 no DC traits,  
4 whereas all other metrics exhibited fewer than 25 such traits (**Fig. S9**). Notably, all five PCs of MO  
5 associated with the anterior limb of the internal capsule, corticospinal tract, and splenium of corpus  
6 callosum favored no DC (**Fig. S9D**).

7  
8 The corticospinal tract stood out with its distinct DC and heritability enrichment patterns. It was unique in  
9 consistently favoring no DC across all DTI metrics and PCs. Remarkably, of the seven functional PC  
10 traits enriched in  $h_X^2$ , four were linked to the corticospinal tract (**Fig. S10**). The  $h_X^2$  of the fourth PC of the  
11 corticospinal tract, when assessed by AD, MD and RD, accounted for over 80% of total heritability,  
12 resulting in an enrichment ratio close to 20 (**Fig. S5E**). This heightened influence of the X-chromosome-  
13 coupled with its comparatively lower total heritability to other tracts-complements existing knowledge  
14 about significant sex differences in the development of the corticospinal tract<sup>50,51</sup>. Further evidence  
15 suggests that increased X-chromosome dosage can notably decrease the white matter volume of the  
16 corticospinal tract<sup>14</sup>. This unique heritability of the corticospinal tract might stem from the additional  
17 dosage of X-escapee genes. Comprehensive details about DC and heritability of DTI traits are available in  
18 the **Supplementary Results**.

19  
20 G360 traits that favored no DC were predominantly associated with the two visual networks and the  
21 default network (**Fig. 3C**). For example, the mean amplitude of visual networks, as well as the mean  
22 connectivity both within and between primary visual and secondary visual networks, strongly favored no  
23 DC. Two of the mean connectivity traits showcased enriched heritability on the X-chromosome ( $h_X^2 =$   
24  $2.45\% \sim 2.86\%$ ), where  $h_X^2$  represented over 21% heritability. Yet, when examining tfMRI, the  $h_X^2$  of  
25 average functional connectivity linked to primary or secondary visual networks was more restrained,  
26 peaking at 1.28%. Two functional connectivity traits within the posterior-multimodal networks were  
27 significantly enriched (**Fig. S11**).

28  
29 For the 1,777 rfMRI ICA traits generated by the whole-brain spatial independent component analysis, we  
30 classified the 76 amplitude traits into two groups<sup>40</sup>: within and outside the triple networks (central  
31 executive, default mode, and salience networks). Similarly, we classified the 1,701 functional  
32 connectivity traits into three groups: within, partially within, and outside the triple networks. We found  
33 that DC status was disproportionately distributed between within and outside-triple-network amplitude  
34 traits (Fisher's exact test, p-value =  $3.43 \times 10^{-5}$ ). Specifically, 77.8% of the traits within the triple



1 network were in favor of full DC (**Fig. S12A**), while the corresponding proportion was only 32.3% for  
2 traits outside the triple network (**Fig. S12B**). However, we did not observe a significant difference in DC  
3 among the three groups for the functional connectivity traits (Fisher's exact test, p-value = 0.062).  $h_x^2$  was  
4 neither significantly different between within and outside triple-network amplitude traits (Wilcoxon rank  
5 sum test, p-value = 0.252 > 0.05/4, **Fig S12C**), nor was it significantly different among within, partially  
6 within, and outside triple-network functional connectivity traits (Wilcoxon rank sum test, minimum p-  
7 value = 0.016 > 0.05/4, **Fig S12D**). More results on the heritability of fMRI traits are in **Supplementary**  
8 **Results**.

9

### 10 **Genetic loci on the X-chromosome associated with complex brain imaging traits.**

11 We carried out XWAS (n = 34,000) for 2,822 complex brain imaging traits on 300,000 SNPs on the X-  
12 chromosome (including 289,000 NPR SNPs and 11,000 PAR SNPs after imputation) using PLINK2<sup>52</sup>  
13 ([www.cog-genomics.org/plink/2.0/](http://www.cog-genomics.org/plink/2.0/)). **Table S4** shows a breakdown of the trait-specific sample size and  
14 number of SNPs. For NPR SNPs, we determined the best DC model for each trait following the model  
15 selection results in the dosage compensation section. Since the equal variance model (the two male  
16 hemizygous genotypes coded as 0 and  $\sqrt{2}$ ) is not available for PLINK2, we set the full DC model (males  
17 coded as 0 and 2) for traits favoring equal variance. On average, 1.37 more significant SNPs at the  
18 genome-wide significant level ( $5.0 \times 10^{-8}$ ) can be identified for no DC traits than if the full DC model  
19 would have been used. For completeness, we also conducted association analyses on the Y-chromosome  
20 for all the traits. No significant SNPs were identified at the genome-wide threshold, so we focused on the  
21 X-chromosome thereafter.

22

23 At the  $5 \times 10^{-8}$  threshold after using wild bootstrap<sup>53</sup> to control for multiple comparisons due to  
24 analyzing 2,822 traits (**Supplementary Methods**), we identified 21 unique top NPR SNPs (linkage  
25 disequilibrium (LD)  $r^2 < 0.1$ ) in five genomic regions (Xp11.4, Xp21.3, Xq13.1, Xq26.3 and Xq28),  
26 associated with 50 different traits (6 SA, 4 BV, 2 AD, 4 FA, 8 RD, 3 MO, 4 MD, and 19 tract-mean),  
27 resulting in 50 trait-locus association pairs (**Table S5-6, Fig 4**). Three out of 50 traits favored no DC. We  
28 did not identify any significant locus in PARs (including the small ~300kb PAR2 region within Xq28; the  
29 rest of Xq28 are in NPR). In general, traits of different modalities did not share the same loci.

30

31 Genetic loci were disproportionately enriched in Xq28 (hypergeometric test, p-value =  $2.79 \times 10^{-18}$ )  
32 (**Fig. 4**). These loci were associated with the tract-mean traits of the anterior corona radiata, posterior  
33 corona radiata, superior longitudinal fasciculus, sagittal stratum, uncinate fasciculus, posterior thalamic  
34 radiation, and superior corona radiata. Splenium of the corpus callosum and posterior limb of the internal

1 capsule were also associated with Xq28, but they were identified through functional PCs of RD and MO,  
2 respectively. Unlike other DTI traits that were only pointed to Xq28, the second PC of the body of corpus  
3 callosum evaluated by RD was associated with a locus in Xp11.4. Three SA traits: left and right total SA,  
4 and left lateral occipital were also associated with loci at the NPR-PAR boundary in Xq28. Moreover, the  
5 SA of left and right supramarginal and the SA of rostral middle frontal were linked to variants in Xq26.3.  
6 Loci associated with BV traits spanned a broader range, including Xp21.3 (left and right thalamus  
7 proper), Xp11.4 (cerebrospinal fluid, CSF), and Xq13.1 (right ventral diencephalon).

8

9 By performing association lookups in NHGRI-EBI GWAS catalog<sup>54</sup>, 13 trait-locus association pairs were  
10 newly identified (**Table 1**). We found evidence that some top SNPs were related to brain structures in  
11 previous studies. For instance, rs2272737 was associated with a variety of DTI measures<sup>17</sup>; rs12843772  
12 was associated with BV, cortical areas<sup>17</sup>, and brain shape<sup>55</sup>.

13

14 We verified the XWAS results from two aspects considering the unique features of the X-chromosome.  
15 First, we estimated genetic effects separately for males and females in a sex-stratified analysis and then  
16 conducted a meta-analysis via Metal (<https://genome.sph.umich.edu/wiki/METAL>) (Methods). Almost all  
17 significant trait-locus pairs in the sex-agnostic analysis were also discovered in the meta-analysis, and  
18 three new trait-locus pairs could only be identified through meta-analysis (**Table S7**). Second, we  
19 separately performed XWAS on UKB phase 4 subjects with European ancestry (UKBE, n = 4,181), UKB  
20 phase 1-4 subjects with South Asian ancestry and Chinese ancestry (UKBSAC, n = 462), and UKB phase  
21 1-4 subjects with African ancestry (UKBA, n = 295) to replicate our discoveries (**Table S8**). Of the 50  
22 top SNPs in discovery and replication, we observed that 100% had effect sizes with the same sign  
23 (proportion test against 0.5, p-value =  $4.22 \times 10^{-12}$ ) by using UKBE. Out of 50 trait-locus pairs, 11  
24 (22.0%) could be replicated after multiple hypothesis correction at a conservative Bonferroni threshold  
25 (p-value <  $0.05/50 = 0.001$ ). None could be replicated by using UKBSAC and UKBA at the same  
26 threshold, possibly due to the limited sample size. We then conducted a meta-analysis (total n = 4,938)  
27 for the separate XWAS results on different ethnic groups, and 22 (44.0%) trait-locus pairs could be  
28 replicated. The effect direction of each replicated SNP was consistent across the ethnic groups. Finally,  
29 we meta-analyzed the XWAS results of UKB phase 1 to 3 (discovery) and UKB phase 4 (replication) in  
30 white subjects (n = 37,772), and 36 more trait-locus pairs were identified, including from new genomic  
31 regions of Xp22.2 and Xp11.23 (**Table S9**).

32

## 1 Shared genetic architectures with brain-related disorders and other phenotypes

2 The identified independent significant SNPs (along with SNPs in LD ( $r^2 \geq 0.6$ )) suggest genetic  
3 connections between the complex brain imaging traits and a spectrum of neurological diseases,  
4 psychiatric disorders, and cognitive functions (**Table S10**). The volume of the right ventral diencephalon  
5 (known as hypothalamus) was significantly associated with rs2361468 in the genomic region Xq13.1,  
6 where it tagged many variants in LD deeply linked to schizophrenia<sup>56-59</sup>. Additionally, rs62606709 in the  
7 same locus was related to educational attainment<sup>60</sup> (**Fig. 5A**). Xq13.1 was enriched with variants related  
8 to neuroticism<sup>18</sup> as well as to neuropsychiatric disorders, such as schizophrenia<sup>61,62</sup>, autism spectrum  
9 disorder (ASD)<sup>62,63</sup>, bipolar disorder (BD)<sup>62</sup>, major depressive disorder (MDD)<sup>62</sup> and Parkinson's disease  
10 (PD)<sup>64</sup>. Through further literature review, we found more evidence of connections between the volume of  
11 the ventral diencephalon and neuropsychiatric and other disorders. For instance, ventral diencephalon is  
12 involved in many pathways found disrupted in schizophrenia<sup>65</sup> and enlargement of ventral diencephalon  
13 was observed in patients with schizophrenia<sup>66</sup> and MDD<sup>67</sup>. Ventral diencephalon atrophy was linked to  
14 AD<sup>68,69</sup>, MDD<sup>70-72</sup>, late-life depression<sup>73</sup>, PD<sup>74</sup>, and spinocerebellar ataxias \ type 3 (SCA3)<sup>75</sup>.

15  
16 We observed colocalization of a locus in Xq28 for tract-mean trait of superior corona radiata (SCR) for  
17 MO (termed by "SCR-MO") and various types of testosterone levels (**Fig. 5B**). The top SNP rs67596711  
18 exhibited a positive effect for both SCR-MO and total testosterone level<sup>76</sup>. SCR-MO favored full DC and  
19 had relatively small but significant X-linked heritability ( $h^2_X = 0.91\%$ ) and mild male: female variance  
20 ratio (1.04). Strikingly, the phenotypic difference between sexes was pronounced: males registered a 0.44  
21 standard deviation increase in SCR-MO compared to females ( $p\text{-value} = 7.23 \times 10^{-210}$ ), which can  
22 likely be attributed to the impact of testosterone. Our findings echo previous research suggesting that the  
23 increasing sex disparities in SCR during puberty are influenced by gonadal hormones<sup>51,77,78</sup>. Additionally,  
24 BV of CSF shared genetic architecture with sex hormone-binding globulin (SHBG) at Xp11.4 (**Fig. 5C**),  
25 indexed by rs35318931, and the effect directions were concordant. Although the gene expression of sex  
26 hormone-associated loci were not enriched in any brain cell type<sup>76</sup> in GTEx<sup>79</sup> (v7), it is worth mentioning  
27 that the brain tissue samples were sourced exclusively from gray matter. These insights underscore the  
28 crucial role of sex hormones in influencing brain functions and structures.

29  
30 Apart from brain-related disorders, we also identified colocalization between complex brain imaging  
31 traits and various conditions and health-related traits (**Table S10**). In Xq26.3, the genetic loci associated  
32 with SA of supramarginal also influenced the onset of myopia<sup>80</sup> and refractive error<sup>81</sup>. In contrast, the  
33 genetic loci associated with DTI traits in Xq28 were mainly connected to type 2 diabetes<sup>82-86</sup>, blood-  
34 related traits including hemoglobin<sup>87</sup>, hematocrit<sup>87</sup>, red blood cell count<sup>87</sup>, serum uric acid levels<sup>88</sup>, serum

1 creatinine levels<sup>88</sup>, blood urea nitrogen levels<sup>88</sup>, and factor VIII levels<sup>89</sup>, and cardiovascular disorders,  
2 such as venous thromboembolism<sup>90</sup>.

3

#### 4 **Gene-based analysis and functional mapping**

5 MAGMA<sup>91</sup> (v1.08) was applied to XWAS summary statistics for gene-based analysis. We identified 29  
6 genes in NPR located in eight genomic regions (Xp11.21, Xp22.12, Xq13.1, Xq21.1, Xq21.2, Xq24,  
7 Xq26.3 and Xq28), associated with 78 traits using Bonferroni correction considering the effective number  
8 of independent traits<sup>92</sup> and the number of protein-coding genes on the X-chromosome ( $p < 0.05/230/747 =$   
9  $2.91 \times 10^{-7}$ , Methods, **Table S11**). *CLIC2*, *DUSP9*, *RAB39B*, *TMLHE*, *VBPI*, and *PJAI* were  
10 previously seen being associated with regional SA phenotypes<sup>16</sup>. *ZNF275*, *DACH2*, and *VMA21* were  
11 identified as being associated with brain connectivity measurement<sup>93</sup> and brain shape<sup>55</sup>. *FAAH2* was  
12 associated with neuroticism measurement<sup>18</sup>. Many detected genes were involved in intellectual disability,  
13 educational attainment, and neuropsychiatric disorders. For instance, *RENBP*<sup>94</sup>, *TKTL1*<sup>58</sup>, and *MAP7D2*<sup>58</sup>  
14 were for schizophrenia; *USP51* was for educational attainment<sup>5,60</sup>; *DACH2* was for AD<sup>95</sup>. *IRAK1* and  
15 *TMEM187* were for Internet addiction disorder<sup>96</sup>. Some genes were linked to subtypes of autism. For  
16 instance, *TMLHE* deficiency, leading to a defect in carnitine biosynthesis, was a risk factor for  
17 nondysmorphic autism<sup>97,98</sup>. *DACH2* was associated with ASD<sup>99</sup>.

18

19 We conducted eQTL mapping using significant independent SNPs based on datasets Genotype-Tissue  
20 Expression<sup>79</sup> (GTEx v8) and CommonMind Consortium<sup>20</sup> (CMC) (**Table S12**). We identified eQTLs in  
21 Xq28 associated with schizophrenia. For example, rs4370701, the eQTL of *FAM3A*, was associated with  
22 the left total SA. Mutations in *FAM3A* led to schizophrenia<sup>58</sup>, and its gene expression exerting an effect  
23 on the cerebellum, cortex, and hypothalamus was regulated by rs4370701. As discussed before, *RENBP*, a  
24 risk gene for schizophrenia among Han Chinese<sup>94</sup>, is regulated by rs12840700. The variant was proposed  
25 to be associated with FA of posterior corona radiata, superior longitudinal fasciculus, and mean FA of all  
26 tracts. Moreover, we identified the relationship between rs2361468 in Xq13.1 and the volume of the right  
27 ventral diencephalon. This variant also regulated gene expression of *PJAI*, for which the mutations  
28 increased the risk of schizophrenia<sup>59</sup> and other neuropsychiatric disorders<sup>62</sup>.

29

30 We mapped the significant independent SNPs to genes based on functional sequences, resulting in 35  
31 unique genes associated with 50 traits of brain anatomy and white matter microstructures. These genes  
32 exhibited diverse association patterns with SNPs that influenced brain measurements, neuropsychiatric  
33 disorders as well as cognitive abilities (**Table S13**). For instance, *DCAF8LI* was linked to educational  
34 attainment<sup>60</sup> and neuroticism<sup>18</sup>, *EFNBI* was linked to schizophrenia<sup>61</sup>, Parkinson's disease<sup>64</sup> and

1 educational attainment<sup>60</sup>, while both *RN7SKP31* and *RNU6-985P* were linked to neuroticism<sup>100</sup>, cognitive  
2 function<sup>101</sup> and educational attainment<sup>60</sup>, through SNPs in nearby intergenic regions. Moreover, *SRPX*  
3 was tagged by rs35318931 in its exonic region, correlating with CSF volume, which was a risk factor for  
4 anorexia nervosa<sup>102</sup>.

5  
6 X-chromosome inactivation (XCI) status<sup>6</sup> was determined for all protein-coding genes identified by  
7 FUMA (**Table S14**). Of the 105 genes, 71 (67.6%) were previously reported inactive, 13 (12.4%) were  
8 escaping, and 21 (20.0%) were variable. When compared with the reference provided by Tukiainen et al<sup>6</sup>,  
9 the identified genes were not enriched in any XCI category (hypergeometric test, p-value > 0.05/3).

10  
11 Long non-coding RNAs (lncRNAs) have merged pivotal regulators. For example, *XIST* and *TIST* not only  
12 initiate XCI but also participate in subsequent complex processes<sup>103,104</sup>. We utilized two approaches –  
13 eQTL mapping and H-MAGMA<sup>105</sup> to map significant SNPs to lncRNAs. H-MAGMA incorporates a  
14 chromatin interaction profile to aggregate SNPs to the nearest genes (Methods, **Table S15**). At a  
15 Bonferroni threshold considering the effective number of independent traits<sup>92</sup> and the number of lncRNAs  
16 on the X-chromosome ( $p < 0.05/230/107 = 2.03 \times 10^{-6}$ ), SNPs associated with 27 traits were mapped to  
17 three lncRNAs in regions Xq26.3, Xp11.21 and Xq28.

18  
19 Finally, we conducted biological annotation via the DAVID Bioinformatics Database<sup>106</sup>  
20 (<https://david.ncifcrf.gov/home.jsp>) and SynGO (<https://syngoportal.org/>) on all the prioritized genes  
21 identified through functional mapping (**Table S16**). For DAVID, 182 of these genes were cataloged and  
22 subsequently analyzed. At the FDR threshold of 0.05, the genes were enriched in transcription elongation  
23 (IPR021156 and PIRSF008633) and were associated with diseases such as autism (KW-1269) and  
24 intellectual disability (KW-0991). At the nominal significance level (p-value < 0.05), these genes were  
25 enriched in biological pathways such as “axon development” (GO:0061564), “neurogenesis” (UP\_KW-  
26 0964), and “nervous system development” (GO:0007399). For SynGO, 14 genes were uniquely mapped  
27 to SynGO annotated genes, and 11 genes have a cellular component annotation (**Fig. S13** and **Table S17**):  
28 four postsynaptic, two both pre- and postsynaptic, three presynaptic, and two could not be mapped to any  
29 specific compartment.

### 31 **Mendelian randomization analysis for a causal effect of gene expression on the human brain**

32 Through eQTL mapping, we have linked the significant variants to gene expression levels, but the causal  
33 influence of gene expression on the brain traits remained ambiguous. We employed summary statistics-  
34 based Mendelian randomization (SMR)<sup>107</sup> to investigate whether XWAS traits could be modulated by

1 gene expression. We also used the HEIDI test<sup>107</sup> to distinguish pleiotropy of causal variants from linkage  
2 (Methods). The eQTL data containing NPR SNPs across 1,639 probes were derived from Sidorenko et  
3 al.'s<sup>44</sup> CAGE whole-blood analysis. After controlling for FDR at 0.05 level, 11 genes showed evidence of  
4 the causal effect that can control the alteration of regional BV, SA, and white matter tracts, and some of  
5 them were also linked to neuropsychiatric diseases and neurodevelopmental disorders (**Table S18**). For  
6 instance, Parkinson's disease-linked gene *DNASE1L1*<sup>64</sup> and schizophrenia-linked gene *FAM50A*<sup>58</sup> exerted  
7 a causal effect on the SA of the left lateral occipital; nondysmorphic autism-linked gene *TMLHE* exerted  
8 a causal effect on the total SA of both hemispheres, the SA of left lateral occipital, and the third PC of AD  
9 of the posterior thalamic radiation. In contrast, the expression of *ZNF275* affected the microstructure of  
10 the superior corona radiata evaluated by AD and MO. After applying the threshold  $p\text{-HEIDI} > 0.05^{107}$  to  
11 screen out linkage from pleiotropy of causal variants, the associations remained the same, which means  
12 the tagged SNPs can simultaneously affect gene expression and brain traits. This finding reinforces the  
13 genetic interplay between brain imaging traits and neurological disorders.

14

#### 15 **Disparity of genetic associations between sexes**

16 We observed substantial phenotypic differences between sexes in complex brain imaging traits  
17 (**Supplementary results and Table S19**). Specifically, 80.1% of traits showed significant phenotypic  
18 differences sexes after controlling an FDR level of 0.05. These gender disparities in the human brain may  
19 be influenced by X-chromosome genetic regions uniquely associated with either sex. To verify this  
20 hypothesis, we conducted sex-stratified XWAS on males ( $n = 16,094$ ) and females ( $n = 17,558$ )  
21 separately. Due to reduced sample sizes post-split, we used a significance threshold of  $1.0 \times 10^{-8}$  for all  
22 analyses here, aligning with Bernabeu's<sup>108</sup> approach in a related study. Within the NPR for males, we  
23 identified 31 trait-locus pairs from 12 genomic regions spanning 31 traits (**Fig. 6A** and **Table S20**).  
24 Notably, 25 out of these 31 traits displayed significant intergender differences. However, for females in  
25 NPR, only nine trait-locus pairs from six genomic regions spanning nine traits were recognized (**Fig. 6B**),  
26 with each trait manifesting pronounced gender disparities. In the PAR for males, we found two trait-locus  
27 pairs in p22.33 related to the third PC of fornix and stria terminalis (FXST) as gauged by FA and an ICA  
28 functional connectivity trait tied to default mode and central executive networks. However, no findings  
29 merged from the female data. To fully utilize the available data, we further meta-analyzed the sex-  
30 stratified XWAS using UKB phase 1-3 and phase 4 subjects with European ancestry (**Table S21**). The  
31 final samples consisted of 18,025 for males and 20,054 for females. Male-specific trait-locus pairs in NPR  
32 doubled from 31 to 68 at the set threshold, whereas the female dataset only added two more pairs in NPR.  
33 In PAR, the male-specific pairs became insignificant, but one new significant pair emerged for females in  
34 Xp22.33, linked to an ICA functional connectivity trait concerning the triple networks.



1 Substantial discrepancies were evident in the association patterns across sexes. Only two genomic regions  
2 (Xq26.3 and Xq28) were simultaneously tagged by male and female-specific associations, but the related  
3 traits differed (**Fig. 6**). The only shared associated traits between genders in Xq28 were the first PC and  
4 mean RD of the anterior corona radiata. Notably, 19 of the 31 male NPR trait-locus pairs (61.3%)  
5 overlapped with findings from the sex-agnostic XWAS, but there were only three out of nine (33.3%)  
6 trait-locus pairs for females (**Fig. 6**). This suggests that the significant loci in the sex-agnostic XWAS  
7 predominantly driven by males. Most traits with significant loci (regardless of sex) favored full DC. The  
8 paucity of significant loci in females aligns with the observation that, for full DC-favoring traits, more  
9 genetic variance manifests in males than females. XWAS statistical methodologies should also account  
10 for heteroskedasticity between genders.

11  
12 According to NHGRI-EBI GWAS catalog<sup>54</sup>, the third PC of posterior thalamic radiation evaluated by MO  
13 in males shared genetic underpinnings with cognitive performance in Xp22.2 (rs5934953). Additionally,  
14 the mean amplitude of language network (G360) in males had a genetic overlap with SHBG in Xp22.12  
15 (rs7883287, **Fig. S14**).

16  
17 Variants can have starkly different genetic effects between sexes, and the extent of these differences can  
18 vary based on traits and typically, tissues<sup>108,109</sup>. These variations might illuminate the observed disparities  
19 in human brain structures across sexes<sup>4,8,32,110</sup> (Methods). We pinpointed nine trait-locus pairs across  
20 seven genomic regions (**Fig. S15** and **Table S22**). All the traits displayed significant sex differences,  
21 including CT of left rostral middle frontal, PCs of anterior corona radiata evaluated by FA and RD,  
22 functional connectivity involving default mode, motor, subcortical cerebellum, central executive, and  
23 limbic networks. Notably, all the variants had moderate effect sizes but distinct directions between sexes,  
24 and therefore none of the trait-locus pairs overlapped with sex-specific associations. For example,  
25 rs12387759 in Xq27.3 revealed marked effect differences between sexes for CT of the left rostral middle  
26 frontal. Similarly, rs62589244 in Xp11.4 had divergent effects on the third PC of anterior corona radiata  
27 assessed by RD. Other genomic regions included Xp22.33, Xq21.31, Xp22.11, Xq22.1, Xp22.33 and  
28 Xq23.

29  
30 Differences in genetic effects suggest an interaction between the variant and sex. Traditional XWAS  
31 which tests for the primary additive effect, can overlook these variants as effects with varying directions  
32 might negate each other in a linear model, leading to the “masking of genetic effect”<sup>108</sup>. Through meta-  
33 analysis using Stouffer’s method<sup>111</sup>, we identified variants overlooked in the sex-agnostic XWAS<sup>112</sup> (**Fig.**



1 **S15**). Four of the nine trait-locus pairs with varying effects were significant. This highlights the need for  
2 XWAS to account for interactions between variant and sex, reflecting XCI uncertainty<sup>43</sup>.

3  
4 Finally, we hypothesized that there might be distinct genetic profiles for subjects that were consistently  
5 located at two tails of phenotypic distributions. Separating these subjects by gender, we compared their  
6 genetic profiles using Fisher's exact test (Methods). For males, we identified 29 significant genetic loci  
7 ( $p$ -value  $< 1.0 \times 10^{-8}$ ), but surprisingly, none for females (**Fig. S16** and **Table S23**). These loci spanned  
8 the entire X-chromosome, rather than clustering in specific regions. Some coincided with loci from our  
9 sex-stratified analysis, such as an Xq28 locus related to CT. This suggests male brain phenotypic  
10 variations can be reflected by diverse X-chromosome genetic profiles, whereas other factors might drive  
11 variations in females.

## 12 13 **DISCUSSION**

14 Genes on the X-chromosome are extensively expressed in the human brain<sup>32</sup>. Evidence shows that  
15 mutations in X-linked genes resulting in intellectual disability are about 3.5-fold more than those in  
16 autosomal genes<sup>113</sup>. To comprehensively investigate the X-chromosome's influence on brain anatomy,  
17 microstructure, and function, we conducted DC and heritability analysis, as well as XWAS for 2,822  
18 complex brain imaging traits. By comparing the three DC models: full DC, no DC, and equal variance in  
19 GCTA-GREML<sup>42</sup>, we determined the DC status for each trait, which may be linked to the DC behaviors  
20 of effective genes in the early development. We proposed that the DC status can be adopted in the model  
21 for XWAS, and more significant variants can be identified for no DC traits compared with if a full DC  
22 model were used. Our research offers a detailed atlas of DC and an atlas of enrichment of X-linked  
23 heritability. And we identified 13 new trait-locus pairs in the NPR at a more reasonable genome-wide  
24 threshold accounting for the number of traits relative to the Bonferroni threshold. By further investigation,  
25 we found that the human brain measurements shared genetic co-architectures with educational attainment  
26 and various brain-related disorders, including autism spectrum disorder, bipolar disorder, major  
27 depressive disorder, and Parkinson's disease. Notably, our data reveal sex-specific genetic association  
28 patterns, where each gender exhibits unique association signals, and for males, the NPR SNPs on the X-  
29 chromosome account for more phenotypic variance.

30  
31 We discovered potential robust interactions between the X-chromosome and autosomes within the human  
32 brain. Traits favoring no DC displayed significantly larger X-linked heritability but diminished  
33 heritability from autosomes, compared to full DC traits. Consequently, the X-chromosome accounted for  
34 11.5% of the total heritability for no DC traits, contrasting with only 6.57% for full DC traits (although it

1 is still greater than the proportion of genomic base pairs located on the NPR of the X-chromosome, ~5%).  
2 We postulate that the special feature of no DC traits is attributable to transcriptional, regulatory, and  
3 epigenetic processes in brain development<sup>31,33</sup>. For example, sex steroid receptors often signal through  
4 epigenetic actions<sup>114</sup>. Several epigenetic mechanisms, such as the levels of DNA methylation and  
5 acetylation, are sex-specific in the brain<sup>115</sup>. Recent studies have demonstrated that sex chromosomes can  
6 also induce sex differences in somatic gene expression in the absence of hormonal differences<sup>29</sup>. Further  
7 evidence indicates that some genes escaping XCI produce proteins that regulate chromatin structures,  
8 potentially influencing autosomal gene expression differences<sup>29</sup>. This includes the histone demethylases  
9 *UTX* and *KDM5C*<sup>116,117</sup>, the histone deacetylase 8<sup>118-120</sup>, and the histone acetyltransferase complex  
10 subunits male-specific lethal 3<sup>121</sup> and mortality factor 4-like 2<sup>122</sup>. Such *trans*-modifications, which do not  
11 alter the nucleotide sequence, might not be reflected in the narrow-sense heritability, accounting for the  
12 reduced heritability ascribed to autosomes. In essence, our analysis offers insights into potential XCI  
13 escape at the trait level within the human brain.

14  
15 The Xq28 genomic region was overly represented in association signals as it contains more than 40% of  
16 the identified protein-coding genes. A third of white matter tracts were linked to a compact 40kb band  
17 segment in Xq28 (152,876,000~152,916,000). Moreover, many intellectual disabilities can be traced back  
18 to gene mutations in Xq28. For example, *CLIC2* and *VBPI* were related to the int22h-1/int22h-2-  
19 mediated duplication region in Xq28, believed to be a potential contributor to intellectual and  
20 developmental disability<sup>123-125</sup>. Loss-of-function mutations in *MECP2* were associated with Rett  
21 syndrome<sup>126</sup>, which mainly affects brain development in girls. Conversely, in males, these mutations  
22 present a spectrum of clinical outcomes, from mild intellectual challenges to severe neonatal  
23 encephalopathy, and in some cases, premature death<sup>127</sup>. It is advisable to investigate the genetic co-  
24 architectures between the tracts as well as emphasize the exploration of the genetic origins of brain  
25 disorders in Xq28 in future studies.

26  
27 In addition to sex-agnostic analyses, we systematically analyzed sex disparities in human brain  
28 characteristics, including phenotype, phenotypic variance, X-linked heritability, and genetic associations.  
29 We found that for most traits, males had both greater phenotypic variance and X-linked heritability than  
30 females, and more sex-specific associations can be identified in males. These results were concordant  
31 with the fact that one of the X-chromosomes is randomly silenced in females in most tissues and cells.  
32 We observed that genetic effects of some variants significantly differed between sexes, showing sex and  
33 variant interactions. Combined with the colocalization between brain measurements and sex-hormone  
34 related traits, such as testosterone levels and SHBG, we postulate that sex hormone plays an essential role

1 in regulating human brain development and sexual dimorphism. However, verification of the hypothesis  
2 needs more data on transcriptome, proteome, and metabolome (termed as “multi-omics”<sup>128</sup>), which is  
3 currently barren for the X-chromosome. We earmark this line of inquiry for future research, emphasizing  
4 the necessity for both innovative methodologies and robust multi-omics data dedicated to the X-  
5 chromosome.

## 6 7 **DATA AVAILABILITY**

8 All UK Biobank data utilized in the study was acquired under application 22783. The eQTL summary  
9 statistics from the CAGE whole-blood study can be downloaded at <https://cnsgenomics.com/content/data>.  
10 All files to generate annotation used in H-MAGMA can be accessed at  
11 <https://doi.org/10.5281/zenodo.5503876>. The summary statistics generated by association analyses in the  
12 current study can be accessed at <https://bigkp.org/>.

## 13 14 **CODE AVAILABILITY**

15 All software and packages used in this study are publicly available. See the URLs and references cited.  
16 The code for generating specific results can be provided upon request.

## 17 18 **WEB RESOURCES**

19 GCTA (v1.93.2 beta, <https://yanglab.westlake.edu.cn/software/gcta/#Overview>); PLINK2 (v2.00a3LM,  
20 <https://www.cog-genomics.org/plink/2.0/>); METAL (v2020-05-05,  
21 [https://genome.sph.umich.edu/wiki/METAL\\_Documentation](https://genome.sph.umich.edu/wiki/METAL_Documentation)); FUMA (v1.4.1, <https://fuma.ctglab.nl>);  
22 MAGMA (v1.08), and ANNOVAR (v2017-07-17) are embedded in FUMA; NHGRI-EBI GWAS  
23 Catalog (2023.06, <https://www.ebi.ac.uk/gwas/>); SMR (<https://yanglab.westlake.edu.cn/software/smr/>);  
24 DAVID Bioinformatics Database (<https://david.ncifcrf.gov>); SynGO (<https://www.syngoportal.org>); H-  
25 MAGMA repository (<https://doi.org/10.5281/zenodo.5503876>).

## 26 27 **ACKNOWLEDGEMENTS**

28 Research reported in this publication was partially supported by the National Institute On Aging (NIA) of  
29 the National Institutes of Health (NIH) under Award Number RF1AG082938 (H.Z. and B.Z) and NIH  
30 MH116527 (TF.L. and H.Z.). The content is solely the responsibility of the authors and does not  
31 necessarily represent the official views of the National Institutes of Health. We thank the individuals  
32 represented in the UKB study for their participation and the research teams for their work in collecting,  
33 processing and disseminating these datasets for analysis. We would like to thank University of North  
34 Carolina at Chapel Hill and the Research Computing groups for providing computational resources and

1 support that have contributed to the research results. This research has been conducted using the UK  
2 Biobank resource (application number 22783), subject to a data transfer agreement. The UKB has  
3 obtained ethics approval from the North West Multi-Centre Research Ethics Committee (MREC,  
4 approval number: 11/NW/0382), and obtained written informed consent from all participants prior to the  
5 study.

## 7 AUTHOR CONTRIBUTIONS

8 Z.J., B.Z., and H.Z. designed the study. Z.J. analyzed the data. TF. L., X.W., TY.L., Y.Y., H.S., P.Y.G.,  
9 J.C. processed the MRI data. L.S. carefully verified all statistical methods used in the study. P.F.S., Y.L.,  
10 J.L.S., D.L., and H.Z. provided feedback on study design and results interpretations. Z.J. wrote the  
11 manuscript and made figures and tables with feedback from all authors.

## 13 COMPETING INTERESTS

14 The authors declare no competing interests.

## 16 REFERENCES

- 17 1. Uller, T., Pen, I., Wapstra, E., Beukeboom, L.W. & Komdeur, J. The evolution of sex  
18 ratios and sex-determining systems. *Trends in Ecology & Evolution* **22**, 292-297 (2007).
- 19 2. Lyon, M.F. Gene action in the X-chromosome of the mouse (*Mus musculus* L.). *nature*  
20 **190**, 372-373 (1961).
- 21 3. Posynick, B.J. & Brown, C.J. Escape From X-Chromosome Inactivation: An  
22 Evolutionary Perspective. *Front Cell Dev Biol* **7**, 241 (2019).
- 23 4. Gegenhuber, B. & Tollkuhn, J. Signatures of sex: Sex differences in gene expression in  
24 the vertebrate brain. *Wiley Interdisciplinary Reviews: Developmental Biology* **9**, e348  
25 (2020).
- 26 5. Lee, J.J. *et al.* Gene discovery and polygenic prediction from a genome-wide association  
27 study of educational attainment in 1.1 million individuals. *Nat Genet* **50**, 1112-1121  
28 (2018).
- 29 6. Tukiainen, T. *et al.* Landscape of X chromosome inactivation across human tissues.  
30 *Nature* **550**, 244-248 (2017).
- 31 7. Oliva, M. *et al.* The impact of sex on gene expression across human tissues. *Science* **369**,  
32 eaba3066 (2020).
- 33 8. Rubinow, D.R. & Schmidt, P.J. Sex differences and the neurobiology of affective  
34 disorders. *Neuropsychopharmacology* **44**, 111-128 (2019).
- 35 9. Ohno, S. *Sex chromosomes and sex-linked genes*, (Springer Science & Business Media,  
36 2013).
- 37 10. Deng, X. *et al.* Evidence for compensatory upregulation of expressed X-linked genes in  
38 mammals, *Caenorhabditis elegans* and *Drosophila melanogaster*. *Nature genetics* **43**,  
39 1179-1185 (2011).

- 1 11. Crowley, J.J. *et al.* Analyses of allele-specific gene expression in highly divergent mouse  
2 crosses identifies pervasive allelic imbalance. *Nature genetics* **47**, 353-360 (2015).
- 3 12. Lentini, A. *et al.* Elastic dosage compensation by X-chromosome upregulation. *Nature*  
4 *Communications* **13**, 1854 (2022).
- 5 13. Disteche, C.M. High expression of the mammalian X chromosome in brain. *Brain*  
6 *research* **1126**, 46-49 (2006).
- 7 14. Warling, A. *et al.* Sex Chromosome Dosage Effects on White Matter Structure in the  
8 Human Brain. *Cerebral Cortex* **31**, 5339-5353 (2021).
- 9 15. Sng, L.M.F., Thomson, P.C. & Trabzuni, D. Genome-wide human brain eQTLs: In-depth  
10 analysis and insights using the UKBEC dataset. *Sci Rep* **9**, 19201 (2019).
- 11 16. Mallard, T.T. *et al.* X-chromosome influences on neuroanatomical variation in humans.  
12 *Nat Neurosci* **24**, 1216-1224 (2021).
- 13 17. Smith, S.M. *et al.* An expanded set of genome-wide association studies of brain imaging  
14 phenotypes in UK Biobank. *Nature neuroscience* **24**, 737-745 (2021).
- 15 18. Luciano, M. *et al.* The influence of X chromosome variants on trait neuroticism.  
16 *Molecular psychiatry* **26**, 483-491 (2021).
- 17 19. West, A.E. & Orlando, V. Epigenetics in brain function. *Neuroscience* **264**, 1-3 (2014).
- 18 20. Fromer, M. *et al.* Gene expression elucidates functional impact of polygenic risk for  
19 schizophrenia. *Nature neuroscience* **19**, 1442-1453 (2016).
- 20 21. Schwartz, C.E. *et al.* X-Linked intellectual disability update 2022. *American Journal of*  
21 *Medical Genetics Part A* **191**, 144-159 (2023).
- 22 22. Lin, A. *et al.* Mapping the stability of human brain asymmetry across five sex-  
23 chromosome aneuploidies. *Journal of Neuroscience* **35**, 140-145 (2015).
- 24 23. Hong, D.S. & Reiss, A.L. Cognitive and neurological aspects of sex chromosome  
25 aneuploidies. *The Lancet Neurology* **13**, 306-318 (2014).
- 26 24. Printzlau, F., Wolstencroft, J. & Skuse, D.H. Cognitive, behavioral, and neural  
27 consequences of sex chromosome aneuploidy. *Journal of neuroscience research* **95**, 311-  
28 319 (2017).
- 29 25. Yurov, Y.B., Vorsanova, S.G., Liehr, T., Kolotii, A.D. & Iourov, I.Y. X chromosome  
30 aneuploidy in the Alzheimer's disease brain. *Molecular cytogenetics* **7**, 1-7 (2014).
- 31 26. Sánchez, X.C. *et al.* Associations of psychiatric disorders with sex chromosome  
32 aneuploidies in the Danish iPSYCH2015 dataset: a case-cohort study. *Lancet Psychiatry*  
33 **10**, 129-138 (2023).
- 34 27. Green, T., Flash, S. & Reiss, A.L. Sex differences in psychiatric disorders: what we can  
35 learn from sex chromosome aneuploidies. *Neuropsychopharmacology* **44**, 9-21 (2019).
- 36 28. Shanmugan, S. *et al.* Sex differences in the functional topography of association  
37 networks in youth. *Proc Natl Acad Sci U S A* **119**, e2110416119 (2022).
- 38 29. Wijchers, P.J. & Festenstein, R.J. Epigenetic regulation of autosomal gene expression by  
39 sex chromosomes. *Trends in Genetics* **27**, 132-140 (2011).
- 40 30. Kaczurkin, A.N., Raznahan, A. & Satterthwaite, T.D. Sex differences in the developing  
41 brain: insights from multimodal neuroimaging. *Neuropsychopharmacology* **44**, 71-85  
42 (2019).
- 43 31. Marrocco, J., Einhorn, N.R. & McEwen, B.S. Environmental epigenetics of sex  
44 differences in the brain. *Handbook of Clinical Neurology* **175**, 209-220 (2020).
- 45 32. Raznahan, A. & Disteche, C.M. X-chromosome regulation and sex differences in brain  
46 anatomy. *Neuroscience & Biobehavioral Reviews* **120**, 28-47 (2021).



- 1 33. Li, M. *et al.* Integrative functional genomic analysis of human brain development and  
2 neuropsychiatric risks. *Science* **362**, eaat7615 (2018).
- 3 34. Wise, A.L., Gyi, L. & Manolio, T.A. eXclusion: toward integrating the X chromosome in  
4 genome-wide association analyses. *The American Journal of Human Genetics* **92**, 643-  
5 647 (2013).
- 6 35. Sun, L., Wang, Z., Lu, T., Manolio, T.A. & Paterson, A.D. eXclusionarY: 10 years later,  
7 where are the sex chromosomes in GWASs? *The American Journal of Human Genetics*  
8 **110**, 903-912 (2023).
- 9 36. Gao, F. *et al.* XWAS: a software toolset for genetic data analysis and association studies  
10 of the X chromosome. *Journal of Heredity* **106**, 666-671 (2015).
- 11 37. Glasser, M.F. *et al.* A multi-modal parcellation of human cerebral cortex. *Nature* **536**,  
12 171-178 (2016).
- 13 38. Zhao, B. *et al.* Genome-wide association analysis of 19,629 individuals identifies variants  
14 influencing regional brain volumes and refines their genetic co-architecture with  
15 cognitive and mental health traits. *Nat Genet* **51**, 1637-1644 (2019).
- 16 39. Zhao, B. *et al.* Common genetic variation influencing human white matter  
17 microstructure. *Science* **372**(2021).
- 18 40. Zhao, B. *et al.* Common variants contribute to intrinsic human brain functional networks.  
19 *Nat Genet* **54**, 508-517 (2022).
- 20 41. Zhao, B. *et al.* Genetic influences on the intrinsic and extrinsic functional organizations  
21 of the cerebral cortex. *medRxiv*, 2021.07.27.21261187 (2021).
- 22 42. Yang, J., Lee, S.H., Goddard, M.E. & Visscher, P.M. GCTA: a tool for genome-wide  
23 complex trait analysis. *Am J Hum Genet* **88**, 76-82 (2011).
- 24 43. Chen, B., Craiu, R.V., Strug, L.J. & Sun, L. The X factor: A robust and powerful  
25 approach to X-chromosome-inclusive whole-genome association studies. *Genet*  
26 *Epidemiol* **45**, 694-709 (2021).
- 27 44. Sidorenko, J. *et al.* The effect of X-linked dosage compensation on complex trait  
28 variation. *Nat Commun* **10**, 3009 (2019).
- 29 45. Silkaitis, K. & Lemos, B. Sex-biased chromatin and regulatory cross-talk between sex  
30 chromosomes, autosomes, and mitochondria. *Biology of Sex Differences* **5**, 2 (2014).
- 31 46. Savic, I. & Arver, S. Sex Differences in Cortical Thickness and Their Possible Genetic  
32 and Sex Hormonal Underpinnings. *Cerebral Cortex* **24**, 3246-3257 (2013).
- 33 47. Zhao, B. *et al.* Heritability of Regional Brain Volumes in Large-Scale Neuroimaging and  
34 Genetic Studies. *Cereb Cortex* **29**, 2904-2914 (2019).
- 35 48. Hofer, E. *et al.* Genetic correlations and genome-wide associations of cortical structure in  
36 general population samples of 22,824 adults. *Nature communications* **11**, 4796 (2020).
- 37 49. Grasby, K.L. *et al.* The genetic architecture of the human cerebral cortex. *Science*  
38 **367**(2020).
- 39 50. Pangelinan, M.M. *et al.* Puberty and testosterone shape the corticospinal tract during  
40 male adolescence. *Brain Structure and Function* **221**, 1083-1094 (2016).
- 41 51. Ho, T.C. *et al.* Sex differences in the effects of gonadal hormones on white matter  
42 microstructure development in adolescence. *Developmental Cognitive Neuroscience* **42**,  
43 100773 (2020).
- 44 52. Chang, C.C. *et al.* Second-generation PLINK: rising to the challenge of larger and richer  
45 datasets. *Gigascience* **4**, s13742-015-0047-8 (2015).

- 1 53. Zhu, H. *et al.* FRATS: Functional Regression Analysis of DTI Tract Statistics. *IEEE Transactions on Medical Imaging* **29**, 1039-1049 (2010).
- 2
- 3 54. Sollis, E. *et al.* The NHGRI-EBI GWAS Catalog: knowledgebase and deposition
- 4 resource. *Nucleic Acids Res* **51**, D977-d985 (2023).
- 5 55. Naqvi, S. *et al.* Shared heritability of human face and brain shape. *Nature genetics* **53**,
- 6 830-839 (2021).
- 7 56. Pantelis, C. *et al.* Biological insights from 108 schizophrenia-associated genetic loci.
- 8 *Nature* **511**, 421-427 (2014).
- 9 57. Pardiñas, A.F. *et al.* Common schizophrenia alleles are enriched in mutation-intolerant
- 10 genes and in regions under strong background selection. *Nature genetics* **50**, 381-389
- 11 (2018).
- 12 58. Trubetsky, V. *et al.* Mapping genomic loci implicates genes and synaptic biology in
- 13 schizophrenia. *Nature* **604**, 502-508 (2022).
- 14 59. Lam, M. *et al.* Comparative genetic architectures of schizophrenia in East Asian and
- 15 European populations. *Nature genetics* **51**, 1670-1678 (2019).
- 16 60. Okbay, A. *et al.* Polygenic prediction of educational attainment within and between
- 17 families from genome-wide association analyses in 3 million individuals. *Nature genetics*
- 18 **54**, 437-449 (2022).
- 19 61. Periyasamy, S. *et al.* Association of schizophrenia risk with disordered niacin metabolism
- 20 in an Indian genome-wide association study. *JAMA psychiatry* **76**, 1026-1034 (2019).
- 21 62. Yao, X. *et al.* Integrative analysis of genome-wide association studies identifies novel
- 22 loci associated with neuropsychiatric disorders. *Translational psychiatry* **11**, 69 (2021).
- 23 63. Al-Sarraj, Y. *et al.* Family-based genome-wide association study of autism spectrum
- 24 disorder in middle eastern families. *Genes* **12**, 761 (2021).
- 25 64. Le Guen, Y. *et al.* Common X-chromosome variants are associated with Parkinson
- 26 disease risk. *Annals of neurology* **90**, 22-34 (2021).
- 27 65. Bernstein, H.G., Keilhoff, G. & Steiner, J. The implications of hypothalamic
- 28 abnormalities for schizophrenia. *Handb Clin Neurol* **182**, 107-120 (2021).
- 29 66. Hodgins, S., Piatosa, M.J. & Schiffer, B. Violence among people with schizophrenia:
- 30 phenotypes and neurobiology. *Neuroscience of aggression*, 329-368 (2014).
- 31 67. Sacchet, M.D., Livermore, E.E., Iglesias, J.E., Glover, G.H. & Gotlib, I.H. Subcortical
- 32 volumes differentiate major depressive disorder, bipolar disorder, and remitted major
- 33 depressive disorder. *Journal of psychiatric research* **68**, 91-98 (2015).
- 34 68. Loskutova, N., Honea, R.A., Brooks, W.M. & Burns, J.M. Reduced limbic and
- 35 hypothalamic volumes correlate with bone density in early Alzheimer's disease. *Journal*
- 36 *of Alzheimer's Disease* **20**, 313-322 (2010).
- 37 69. King, K.S. *et al.* Effect of Leukocyte Telomere Length on Total and Regional Brain
- 38 Volumes in a Large Population-Based Cohort. *JAMA Neurology* **71**, 1247-1254 (2014).
- 39 70. Ancelin, M.-L. *et al.* Lifetime major depression and grey-matter volume. *Journal of*
- 40 *psychiatry and neuroscience* **44**, 45-53 (2019).
- 41 71. Videbech, P. & Ravnkilde, B. Hippocampal volume and depression: a meta-analysis of
- 42 MRI studies. *American Journal of Psychiatry* **161**, 1957-1966 (2004).
- 43 72. Stratmann, M. *et al.* Insular and hippocampal gray matter volume reductions in patients
- 44 with major depressive disorder. *PloS one* **9**, e102692 (2014).



- 1 73. Geerlings, M.I. & Gerritsen, L. Late-life depression, hippocampal volumes, and  
2 hypothalamic-pituitary-adrenal axis regulation: a systematic review and meta-analysis.  
3 *Biological psychiatry* **82**, 339-350 (2017).
- 4 74. Breen, D.P. *et al.* Hypothalamic volume loss is associated with reduced melatonin output  
5 in Parkinson's disease. *Mov Disord* **31**, 1062-6 (2016).
- 6 75. Arruda, W.O. *et al.* Volumetric MRI Changes in Spinocerebellar Ataxia (SCA3 and  
7 SCA10) Patients. *The Cerebellum* **19**, 536-543 (2020).
- 8 76. Ruth, K.S. *et al.* Using human genetics to understand the disease impacts of testosterone  
9 in men and women. *Nature medicine* **26**, 252-258 (2020).
- 10 77. Bava, S. *et al.* Sex differences in adolescent white matter architecture. *Brain Research*  
11 **1375**, 41-48 (2011).
- 12 78. Tan, G.C.-Y. *et al.* The influence of microsatellite polymorphisms in sex steroid receptor  
13 genes ESR1, ESR2 and AR on sex differences in brain structure. *NeuroImage* **221**,  
14 117087 (2020).
- 15 79. Consortium, G. *et al.* The Genotype-Tissue Expression (GTEx) pilot analysis: multitissue  
16 gene regulation in humans. *Science* **348**, 648-660 (2015).
- 17 80. Tedja, M.S. *et al.* Genome-wide association meta-analysis highlights light-induced  
18 signaling as a driver for refractive error. *Nature Genetics* **50**, 834-848 (2018).
- 19 81. Hysi, P.G. *et al.* Meta-analysis of 542,934 subjects of European ancestry identifies new  
20 genes and mechanisms predisposing to refractive error and myopia. *Nature Genetics* **52**,  
21 401-407 (2020).
- 22 82. Voight, B.F. *et al.* Twelve type 2 diabetes susceptibility loci identified through large-  
23 scale association analysis. *Nature Genetics* **42**, 579-589 (2010).
- 24 83. Li, H. *et al.* A Genome-Wide Association Study Identifies GRK5 and RASGRP1 as Type  
25 2 Diabetes Loci in Chinese Hans. *Diabetes* **62**, 291-298 (2012).
- 26 84. Hara, K. *et al.* Genome-wide association study identifies three novel loci for type 2  
27 diabetes. *Human Molecular Genetics* **23**, 239-246 (2013).
- 28 85. Ishigaki, K. *et al.* Large-scale genome-wide association study in a Japanese population  
29 identifies novel susceptibility loci across different diseases. *Nature Genetics* **52**, 669-679  
30 (2020).
- 31 86. Suzuki, K. *et al.* Identification of 28 new susceptibility loci for type 2 diabetes in the  
32 Japanese population. *Nature Genetics* **51**, 379-386 (2019).
- 33 87. Vuckovic, D. *et al.* The Polygenic and Monogenic Basis of Blood Traits and Diseases.  
34 *Cell* **182**, 1214-1231.e11 (2020).
- 35 88. Sakaue, S. *et al.* A cross-population atlas of genetic associations for 220 human  
36 phenotypes. *Nat Genet* **53**, 1415-1424 (2021).
- 37 89. Sabater-Lleal, M. *et al.* Genome-Wide Association Transethnic Meta-Analyses Identifies  
38 Novel Associations Regulating Coagulation Factor VIII and von Willebrand Factor  
39 Plasma Levels. *Circulation* **139**, 620-635 (2019).
- 40 90. Lindström, S. *et al.* Genomic and transcriptomic association studies identify 16 novel  
41 susceptibility loci for venous thromboembolism. *Blood* **134**, 1645-1657 (2019).
- 42 91. de Leeuw, C.A., Mooij, J.M., Heskes, T. & Posthuma, D. MAGMA: generalized gene-set  
43 analysis of GWAS data. *PLoS Comput Biol* **11**, e1004219 (2015).
- 44 92. Wang, H. *et al.* Genotype-by-environment interactions inferred from genetic effects on  
45 phenotypic variability in the UK Biobank. *Science advances* **5**, eaaw3538 (2019).

- 1 93. Sha, Z., Schijven, D., Fisher, S.E. & Francks, C. Genetic architecture of the white matter  
2 connectome of the human brain. *Science Advances* **9**, eadd2870 (2023).
- 3 94. Wong, E.H. *et al.* Common variants on Xq28 conferring risk of schizophrenia in Han  
4 Chinese. *Schizophrenia bulletin* **40**, 777-786 (2014).
- 5 95. Yu, W., Wang, M. & Zhang, Y. Construction of lncRNA-ceRNA Networks to Reveal the  
6 Potential Role of Lfng/Notch1 Signaling Pathway in Alzheimer's Disease. *Current*  
7 *Alzheimer Research* (2022).
- 8 96. Haghigatfard, A. *et al.* The first genome-wide association study of internet addiction;  
9 Revealed substantial shared risk factors with neurodevelopmental psychiatric disorders.  
10 *Research in Developmental Disabilities* **133**, 104393 (2023).
- 11 97. Celestino-Soper, P.B. *et al.* A common X-linked inborn error of carnitine biosynthesis  
12 may be a risk factor for nondysmorphic autism. *Proceedings of the National Academy of*  
13 *Sciences* **109**, 7974-7981 (2012).
- 14 98. Beaudet, A.L. Brain carnitine deficiency causes nonsyndromic autism with an extreme  
15 male bias: A hypothesis. *Bioessays* **39**, 1700012 (2017).
- 16 99. Bralten, J. *et al.* Autism spectrum disorders and autistic traits share genetics and biology.  
17 *Molecular Psychiatry* **23**, 1205-1212 (2018).
- 18 100. Luciano, M. *et al.* Association analysis in over 329,000 individuals identifies 116  
19 independent variants influencing neuroticism. *Nat Genet* **50**, 6-11 (2018).
- 20 101. Homann, J. *et al.* Genome-Wide Association Study of Alzheimer's Disease Brain  
21 Imaging Biomarkers and Neuropsychological Phenotypes in the European Medical  
22 Information Framework for Alzheimer's Disease Multimodal Biomarker Discovery  
23 Dataset. *Frontiers in Aging Neuroscience* **14**(2022).
- 24 102. Wade, T.D. *et al.* Genetic variants associated with disordered eating. *International*  
25 *Journal of Eating Disorders* **46**, 594-608 (2013).
- 26 103. Engreitz, J.M. *et al.* The Xist lncRNA Exploits Three-Dimensional Genome Architecture  
27 to Spread Across the X Chromosome. *Science* **341**, 1237973 (2013).
- 28 104. Gayen, S., Maclary, E., Buttigieg, E., Hinten, M. & Kalantry, S. A Primary Role for the  
29 Tsix lncRNA in Maintaining Random X-Chromosome Inactivation. *Cell Reports* **11**,  
30 1251-1265 (2015).
- 31 105. Sey, N.Y. *et al.* A computational tool (H-MAGMA) for improved prediction of brain-  
32 disorder risk genes by incorporating brain chromatin interaction profiles. *Nature*  
33 *Neuroscience* **23**, 583-593 (2020).
- 34 106. Sherman, B.T. *et al.* DAVID: a web server for functional enrichment analysis and  
35 functional annotation of gene lists (2021 update). *Nucleic Acids Res* **50**, W216-w221  
36 (2022).
- 37 107. Zhu, Z. *et al.* Integration of summary data from GWAS and eQTL studies predicts  
38 complex trait gene targets. *Nature genetics* **48**, 481-487 (2016).
- 39 108. Bernabeu, E. *et al.* Sex differences in genetic architecture in the UK Biobank. *Nature*  
40 *genetics* **53**, 1283-1289 (2021).
- 41 109. Khramtsova, E.A., Davis, L.K. & Stranger, B.E. The role of sex in the genomics of  
42 human complex traits. *Nature Reviews Genetics* **20**, 173-190 (2019).
- 43 110. Ritchie, S.J. *et al.* Sex Differences in the Adult Human Brain: Evidence from 5216 UK  
44 Biobank Participants. *Cereb Cortex* **28**, 2959-2975 (2018).

- 1 111. Stouffer, S.A., Suchman, E.A., DeVinney, L.C., Star, S.A. & Williams Jr, R.M. The  
2 american soldier: Adjustment during army life.(studies in social psychology in world war  
3 ii), vol. 1. (1949).
- 4 112. Lin, B. & Sun, L. Better together against genetic effect heterogeneity: a sex-combined  
5 interaction analysis of testosterone levels in the UK Biobank data. *bioRxiv*,  
6 2022.06.08.495202 (2022).
- 7 113. Neri, G., Schwartz, C.E., Lubs, H.A. & Stevenson, R.E. X-linked intellectual disability  
8 update 2017. *Am J Med Genet A* **176**, 1375-1388 (2018).
- 9 114. Tetel, M.J. Nuclear receptor coactivators: essential players for steroid hormone action in  
10 the brain and in behaviour. *Journal of neuroendocrinology* **21**, 229-237 (2009).
- 11 115. Labonté, B. *et al.* Sex-specific transcriptional signatures in human depression. *Nature*  
12 *medicine* **23**, 1102-1111 (2017).
- 13 116. Christensen, J. *et al.* RBP2 belongs to a family of demethylases, specific for tri-and  
14 dimethylated lysine 4 on histone 3. *Cell* **128**, 1063-1076 (2007).
- 15 117. Iwase, S. *et al.* The X-linked mental retardation gene SMCX/JARID1C defines a family  
16 of histone H3 lysine 4 demethylases. *Cell* **128**, 1077-1088 (2007).
- 17 118. Buggy, J.J. *et al.* Cloning and characterization of a novel human histone deacetylase,  
18 HDAC8. *Biochemical Journal* **350**, 199-205 (2000).
- 19 119. Hu, E. *et al.* Cloning and characterization of a novel human class I histone deacetylase  
20 that functions as a transcription repressor. *Journal of Biological Chemistry* **275**, 15254-  
21 15264 (2000).
- 22 120. Van den Wyngaert, I. *et al.* Cloning and characterization of human histone deacetylase 8.  
23 *FEBS letters* **478**, 77-83 (2000).
- 24 121. Smith, E.R. *et al.* A human protein complex homologous to the Drosophila MSL  
25 complex is responsible for the majority of histone H4 acetylation at lysine 16. *Molecular*  
26 *and cellular biology* **25**, 9175-9188 (2005).
- 27 122. Cai, Y. *et al.* Identification of new subunits of the multiprotein mammalian  
28 TRRAP/TIP60-containing histone acetyltransferase complex. *Journal of Biological*  
29 *Chemistry* **278**, 42733-42736 (2003).
- 30 123. Andersen, E.F., Baldwin, E.E., Ellingwood, S., Smith, R. & Lamb, A.N. Xq28  
31 duplication overlapping the int22h-1/int22h-2 region and including RAB39B and CLIC2  
32 in a family with intellectual and developmental disability. *American Journal of Medical*  
33 *Genetics Part A* **164**, 1795-1801 (2014).
- 34 124. El-Hattab, A.W. *et al.* Clinical characterization of int22h1/int22h2-mediated Xq28  
35 duplication/deletion: new cases and literature review. *BMC medical genetics* **16**, 1-12  
36 (2015).
- 37 125. Ballout, R.A. *et al.* Int22h1/Int22h2-mediated Xq28 duplication syndrome: de novo  
38 duplications, prenatal diagnoses, and additional phenotypic features. *Human mutation* **41**,  
39 1238-1249 (2020).
- 40 126. Van Esch, H. MECP2 Duplication Syndrome. in *GeneReviews*(®) (eds. Adam, M.P. *et*  
41 *al.*) (University of Washington, Seattle  
42 Copyright © 1993-2023, University of Washington, Seattle. GeneReviews is a registered  
43 trademark of the University of Washington, Seattle. All rights reserved., Seattle (WA),  
44 1993).
- 45 127. Pascual-Alonso, A., Martínez-Monseny, A.F., Xiol, C. & Armstrong, J. MECP2-Related  
46 Disorders in Males. *Int J Mol Sci* **22**(2021).

- 1 128. Xu, Y. *et al.* An atlas of genetic scores to predict multi-omic traits. *Nature* **616**, 123-131  
2 (2023).
- 3 129. Klein, A. & Tourville, J. 101 labeled brain images and a consistent human cortical  
4 labeling protocol. *Frontiers in neuroscience* **6**, 171 (2012).
- 5 130. Desikan, R.S. *et al.* An automated labeling system for subdividing the human cerebral  
6 cortex on MRI scans into gyral based regions of interest. *Neuroimage* **31**, 968-980  
7 (2006).
- 8 131. Jahanshad, N. *et al.* Multi-site genetic analysis of diffusion images and voxelwise  
9 heritability analysis: A pilot project of the ENIGMA–DTI working group. *Neuroimage*  
10 **81**, 455-469 (2013).
- 11 132. Kochunov, P. *et al.* Multi-site study of additive genetic effects on fractional anisotropy of  
12 cerebral white matter: comparing meta and megaanalytical approaches for data pooling.  
13 *Neuroimage* **95**, 136-150 (2014).
- 14 133. Ji, J.L. *et al.* Mapping the human brain's cortical-subcortical functional network  
15 organization. *Neuroimage* **185**, 35-57 (2019).
- 16 134. Alfaro-Almagro, F. *et al.* Image processing and Quality Control for the first 10,000 brain  
17 imaging datasets from UK Biobank. *Neuroimage* **166**, 400-424 (2018).
- 18 135. Elliott, L.T. *et al.* Genome-wide association studies of brain imaging phenotypes in UK  
19 Biobank. *Nature* **562**, 210-216 (2018).
- 20 136. Rolls, E.T., Huang, C.-C., Lin, C.-P., Feng, J. & Joliot, M. Automated anatomical  
21 labelling atlas 3. *Neuroimage* **206**, 116189 (2020).
- 22 137. Finn, E.S. *et al.* Functional connectome fingerprinting: identifying individuals using  
23 patterns of brain connectivity. *Nature neuroscience* **18**, 1664-1671 (2015).
- 24 138. Yeo, B.T. *et al.* The organization of the human cerebral cortex estimated by intrinsic  
25 functional connectivity. *Journal of neurophysiology* (2011).
- 26 139. Alfaro-Almagro, F. *et al.* Confound modelling in UK Biobank brain imaging.  
27 *NeuroImage* **224**, 117002 (2021).
- 28 140. Wang, K., Li, M. & Hakonarson, H. ANNOVAR: functional annotation of genetic  
29 variants from high-throughput sequencing data. *Nucleic acids research* **38**, e164-e164  
30 (2010).
- 31 141. Ramasamy, A. *et al.* Genetic variability in the regulation of gene expression in ten  
32 regions of the human brain. *Nat Neurosci* **17**, 1418-1428 (2014).
- 33 142. Schmitt, A.D. *et al.* A compendium of chromatin contact maps reveals spatially active  
34 regions in the human genome. *Cell reports* **17**, 2042-2059 (2016).
- 35 143. Sey, N.Y., Pratt, B.M. & Won, H. Annotating genetic variants to target genes using H-  
36 MAGMA. *Nature Protocols* **18**, 22-35 (2023).
- 37

## 1 METHODS

### 2 Image acquisition and processing

3 The raw structural MRI (sMRI), diffusion MRI (dMRI), resting-state functional MRI (rfMRI), and task-  
4 evoked functional MRI (tfMRI) raw images were acquired from the UK Biobank  
5 (<http://www.ukbiobank.ac.uk/resources/>) with application 22783. Detailed information for the image  
6 acquisition is available at [https://biobank.ctsu.ox.ac.uk/crystal/crystal/docs/brain\\_mri.pdf](https://biobank.ctsu.ox.ac.uk/crystal/crystal/docs/brain_mri.pdf). After  
7 processing the raw images, 2,822 imaging-derived traits for the human brain were utilized in the study.  
8 That is, 230 sMRI traits for cortical structures, 635 diffusion tensor imaging (DTI) traits from dMRI for  
9 microstructures of white matter tracts; and 1,957 rfMRI and tfMRI traits for intrinsic and extrinsic brain  
10 functions, respectively. For each trait and continuous covariate variable (discussed later), we removed  
11 values greater than five times the median absolute deviation from the median value.

12  
13 We processed the sMRI locally using consistent procedures via advanced normalization tools (ANTs,  
14 <http://stnava.github.io/ANTs>) and conducted multi-atlas cortical parcellation based on the manually edited  
15 labels of the publicly available MindBoggle-101 dataset<sup>129</sup>. We removed three ROIs (5<sup>th</sup> ventricle, left,  
16 and right lesion) due to a high missing rate. More details can be found in ref<sup>38</sup>. There were 101 traits for  
17 regional BVs, including three global traits – gray matter volume (GMV), white matter volume (WMV),  
18 and total BV. We picked up 62 cortical ROIs and generated 62 regional traits for CV as well as the global  
19 mean CV. The 66 SA traits used in our analysis were directly downloaded from UKB Category 193. The  
20 traits were generated with Freesurfer (<https://surfer.nmr.mgh.harvard.edu>) by parcellation of the pial  
21 surface using Desikan-Killiany<sup>130</sup> parcellation.

22  
23 DTI evaluated dMRI in a tensor model and analyzed water molecular diffusions in all directions. Five  
24 metrics of DTI: Axial diffusivity (AD), fractional anisotropy (FA), mean diffusivity (MD), mode of  
25 anisotropy (MO), and radial diffusivity (RD) were applied to each voxel of the image. Given a metric, a  
26 tract-mean trait was generated by taking the average of all voxels in a tract. In total, we got 110 tract-  
27 mean traits, including 105 tract-mean traits for all tract-metric pairs and 5 overall-mean traits across all  
28 tracts ( $21 \times 5 + 5 = 110$ ). We also applied functional principal component analysis (FPCA) to the voxels in  
29 a tract and picked up the top five functional PCs for the tract-metric pair. We generated 525 ( $= 5 \times 5 \times 21$ )  
30 functional PC traits for all tracts and metrics. The five DTI metrics can reflect different patterns of water  
31 diffusion in white matter tracts. For example, AD is the eigenvalue of the principal direction; FA is  
32 related to directionality; MD quantifies the magnitude of absolute directionality; MO is the third moment  
33 of a tensor; and RD is the average of the eigenvalues of secondary diffusion directions. The tracts were



1 labeled by the ENIGMA-DTI pipeline<sup>131,132</sup>. Check **Table S1** for the full names of the 21 tracts, and ref<sup>39</sup>  
2 for details of tract generation based on ENIGMA-DTI pipeline and FPCA.

3  
4 We applied parcellation-based methods with Glasser360<sup>37</sup> atlas to generate 90 mean amplitude and  
5 functional connectivity traits for both rfMRI and tfMRI. We first projected the rfMRI and tfMRI data on  
6 the Glasser360 atlas and generated 360×360 functional connectivity matrices. The 360 functional areas  
7 were grouped into 12 functional networks<sup>133</sup>. Then 12 mean amplitude traits and 78 (=12+11×122) mean  
8 pairwise functional connectivity traits were extracted from the 12 functional networks. Refer to the  
9 Supplementary Note in ref<sup>41</sup> for detailed steps of the parcellation-based dimension reduction procedure. In  
10 addition, we locally used the whole brain spatial independent component analysis (ICA) approach to  
11 estimate functional brain regions for rfMRI. The detailed procedures were documented in UKB imaging  
12 pipeline<sup>134</sup>. We generated 76 node amplitude traits for spontaneous neuronal activity, 1,695 pairwise  
13 functional connectivity traits for coactivity for node pairs, and six global connectivity measures for all  
14 pairwise functional connectivity<sup>135</sup>. We also manually labeled the 76 node amplitude traits using the  
15 automated anatomical labelling atlas<sup>136</sup> (refer to Table S24 in ref<sup>40</sup>) and then mapped them onto major  
16 functional networks<sup>137,138</sup>. The assigned location and functional networks are available in **Table S1**.

17

## 18 **Discovery and replication data processing for association analyses**

19 In X-chromosome association analysis (XWAS), we analyzed the UKB phase 1-3 imaging data (up to  
20 February 2020) for discovery purposes, encompassing 36,000 samples. For replication, we employed the  
21 phase 4 imaging data, which included 3,100 samples. We downloaded the version 3 of imputed genetic  
22 data from UKB. Details regarding genotyping and imputation are available in the UKB documentation.  
23 For data processing, we utilized PLINK2<sup>52</sup> (v2.00a3LM, <https://www.cog-genomics.org/plink/2.0/>) and  
24 treated each imaging trait set individually. Blow is a brief introduction to data preprocessing, for more  
25 details please refer to **Supplementary Methods**.

26

27 In our discovery data, we prioritized subjects of non-Hispanic white ancestries (Field 21000). Based on  
28 UKB-provided quality control details, we filtered out subjects based on specific criteria: excessive  
29 heterozygosity (Field ID 22027), inconsistencies between reported and genetic gender (Field ID 22001),  
30 potential sex chromosome anomalies (Field ID 22019), and a missing genotype rate exceeding 5%. We  
31 further refined our SNP data based on imputation score, minor allele frequency (MAF), and a Hardy-  
32 Weinberg equilibrium test. In addition, multiallelic sites were excluded. To address potential relatedness  
33 among subjects, we employed GCTA<sup>42</sup> (v1.93.2 beta,  
34 <https://yanglab.westlake.edu.cn/software/gcta/#Overview>). We calculated the genetic relationship matrix

1 (GRM) for each autosome and merged them. Subjects with a high degree of relatedness (--grm-cutoff  
2 0.05) were pruned; about 1,800 subjects were excluded in this step.

3  
4 The resulting discovery dataset consisted of 33,591 subjects, with a range of 29,078 to 35,793 across  
5 various imaging traits. This included 15,939 males and 17,652 females. For our analyses, 289,866 NPR  
6 SNPs and 11,508 PAR SNPs on the X-chromosome were considered. We did not impute the Y-  
7 chromosome genetic data, but after the above filters, 140 SNPs remained for analysis.

8  
9 For replication, the genetic data encompassed UKB phase 4 non-Hispanic white subjects (UKBE, n =  
10 4,181), phases 1-4 South Asian and Chinese subjects (UKBSAC, n = 462), and phases 1-4 African  
11 subjects (UKBA, n = 295). To optimize our sample size, we combined white subjects previously excluded  
12 from the discovery phase due to relatedness with phase 4 white subjects. Subsequently, we executed  
13 another round of relatedness pruning (--grm-cutoff 0.05). Both Asian and African subjects underwent  
14 relatedness pruning at the same threshold. All other quality control measures remained consistent with  
15 prior steps.

### 16 17 **Dosage compensation and heritability analysis**

18 We employed the GREML analysis tool from GCTA<sup>42</sup> for heritability analysis on NPR SNPs. Three  
19 distinct model assumptions for GRMs on the X-chromosome are acknowledged: full DC (--dc 1), no DC  
20 (--dc 0), and equal variance (without specifying --dc)<sup>42</sup>. These models differ in their coding schemes  
21 between sexes, affecting genetic relationships. For instance, females are consistently coded as {0, 1, 2}.  
22 The full DC model codes males as {0, 2}, leading to double the genetic variance of females. In contrast,  
23 the no DC model codes males as {0, 1}, halving their genetic variance. The equal variance model codes  
24 males similarly to females in terms of genetic variance.

25  
26 We produced GRMs for the X-chromosome under various assumptions to determine the optimal model  
27 for each trait. By default, we presumed a consistent allele frequency distribution between causal and  
28 genotyped SNPs, adjusting for imperfect LD (--grm-adj 0). Both GRMs for autosomes and the X-  
29 chromosome were included in one model to jointly estimate their respective heritabilities, as this method  
30 can identify more total heritability compared to analyzing them separately<sup>16</sup>.

31  
32 For sMRI and dMRI traits, we accounted for various predictors like the indicator of phase 3 data (1 if the  
33 subject was released in phase3 and 0 otherwise), the UK Biobank assessment center (Field 54), genotype  
34 measurement batch (Field 22000), top 40 genetic principal components (Field 22009), age at imaging,



1 age-squared, sex, age-sex interaction, and age-squared-sex-interaction. Additionally, for sMRI's non-  
2 global traits, we adjusted for measurements like total BV, mean CT, and left/right total SA. For fMRI  
3 traits, we adjusted for head size (Field ID 25000), scan position X (Field ID 25756), scan position Y  
4 (Field ID 25757), scan position Z (Field ID 25758), scan table position (Field ID 25759), mean rfMRI  
5 head motion (Field ID 25741), and mean tfMRI head motion (Field ID 25742), as well as scan position X  
6 squared, scan position Z squared, mean rfMRI head motion squared and mean tfMRI head motion  
7 squared by following Alfaro-Almagro et al.<sup>139</sup>.

8  
9 We employed the likelihood-ratio-test (LRT) with a specific null distribution  $0.5\chi_1^2 + 0.5\chi_0^2$  to assess the  
10 X-chromosome's variance component. The significance of  $h_X^2$  across traits was determined after adjusting  
11 for the false discovery rate (FDR) using the Benjamini-Hochberg procedure at an  $\alpha = 0.05$  level. The  
12 Akaike information criterion (AIC) was computed to compare the three model assumptions. We selected  
13 the model with the smallest AIC as the optimal DC model, subsequently creating an atlas of DC for  
14 complex brain imaging traits.

#### 15 16 **Enrichment analysis for heritability**

17 Building on the methodology of Mallard et al.<sup>16</sup>, we characterized enrichment as the ratio of  $h_X^2$  to the  
18 proportion of genetic variants on the X-chromosome. Variant counts for each chromosome were sourced  
19 from the Genome Reference Consortium Human Build 37 (GRCh37 release 13), accessible at  
20 [https://www.ncbi.nlm.nih.gov/assembly/GCF\\_000001405.13](https://www.ncbi.nlm.nih.gov/assembly/GCF_000001405.13). Specifically, the measurement for  $h_X^2$   
21 enrichment is  $\frac{h_X^2/h_{all}^2}{length_x/length_{all}}$ . We then tested if  $h_X^2$  was enriched or depleted by using a two-sided Z-test  
22 with statistic  $\frac{observed\ h_X^2 - expected\ h_X^2}{standard\ error\ of\ h_X^2}$ , where  $expected\ h_X^2 = \frac{h_{all}^2 \times length_x}{length_{all}}$ , and standard error of  $h_X^2$  was  
23 computed by using GCTA. After calculating the p-value from the Z-test, it was adjusted using FDR at the  
24 level  $\alpha = 0.05$ . If the resulting Z-statistic for a trait exceeded 0, it indicated  $h_X^2$  enrichment for that trait;  
25 if not,  $h_X^2$  depletion.

#### 26 27 **Sex-stratified heritability and phenotypic variance analysis**

28 We conducted a sex-stratified heritability analysis to directly contrast the  $h_X^2$  differences between males  
29 and females. Within the GREML framework, we accounted for the same covariates as in the sex-agnostic  
30 analysis, excluding sex and its related interactions. We adopted the equal variance model in GCTA for all  
31 traits. This model presumes males and females to have equivalent heritability. Any deviation of the ratio

32  $\rho_X = \frac{h_{X,male}^2}{h_{X,female}^2}$  from 1 indicates evidence of full DC or no DC. For each DC group, we calculated average

1 heritability estimates for both sexes and then derived the ratio  $\widehat{\rho}_X = \frac{\sum_i \widehat{h_{X,i,male}^2}/p}{\sum_i \widehat{h_{X,i,female}^2}/p}$ , where  $p$  represents the  
2 number of traits with non-zero total heritability in sex-agnostic analysis (a total of 2,810). We used  
3 bootstrap methods (employing R's "boot" function over 5,000 iterations) to determine the standard error  
4 of  $\widehat{\rho}_X$ . The GCTA output provides the phenotypic variance, denoted as  $V_p$  for both sexes. We subsequently  
5 computed the phenotypic variance ratio for each trait as  $\frac{V_{p,male}}{V_{p,female}}$ .

6

### 7 **XWAS, sex-stratified XWAS, and meta-analysis**

8 We conducted linear association tests for NPR, PAR, and Y-chromosome SNPs using PLINK2  
9 (v2.00a3LM). For traits favoring full DC or equal variance, we adopted the full DC model (--xchr-model  
10 2); otherwise, we used the no DC model (--xchr-model 1). The direction of the effect size corresponded to  
11 the minor allele in the input data. However, the minor allele for a particular variant might differ between  
12 datasets. In the discovery analysis, we adjusted for the same covariates as in the heritability analysis. For  
13 replication, adjustments were made for phase 3 and phase 4 indicators, the UK Biobank assessment  
14 center, the top 10 genetic PC, and all other imaging-related covariates. We then adjusted the raw p-values  
15 using wild bootstrap across all traits (**Supplementary Methods**). SNPs achieving a genome-wide  
16 threshold of  $5 \times 10^{-8}$  were considered significant. For LD pruning, we used FUMA (v1.4.1,  
17 <https://fuma.ctglab.nl/>), incorporating both sexes for LD computation. SNPs in  $LD > 0.6$  were grouped  
18 under one independent significant SNP. Those in  $LD > 0.1$  were consolidated under a single top SNP. LD  
19 blocks defined by adjacent independent significant SNPs within 250kb of each other were merged into  
20 one genetic locus. For sex-stratified XWAS, we partitioned males and females in the discovery cohort and  
21 carried out separate XWAS for each. The covariate adjustments remained consistent, excluding sex and  
22 its interactions.

23

24 We employed a meta-analysis to integrate separate XWAS results using METAL (version released on  
25 05.05.2020, [https://genome.sph.umich.edu/wiki/METAL\\_Documentation](https://genome.sph.umich.edu/wiki/METAL_Documentation)). Inputs to the software  
26 included effect alleles, effect sizes, p-values, and sample sizes from individual analyses. The default  
27 procedure was adopted. Initially, p-values were transformed into Z-statistics. Then, to align all studies to  
28 a consistent reference allele, the effect alleles and the direction of the effect sizes were utilized. An  
29 overarching Z-statistic was derived by taking a sample-size weighted sum of each individual statistic. The  
30 weighting was based on the square root of the participant count in each study. In our research, the meta-  
31 analysis combined the outcomes of sex-stratified XWAS, replication XWAS from UKBE, UKBSAC, and  
32 UKBA cohorts, and both discovery and replication XWAS from UKBE participants.

1

## 2 **Gene-level analysis and biological annotation**

3 We executed a gene-based association analysis on 747 protein-coding genes on the X-chromosome using  
4 MAGMA (v1.08) within FUMA (v1.4.1). We employed GRCh37 to map SNPs to genes by their physical  
5 locations, excluding upstream and downstream regions from our consideration. A Bonferroni correction  
6 was applied for significance, factoring in both the number of genes and the effective number of  
7 independent traits<sup>92</sup>, resulting in a threshold of p-value < 0.05/747/230. For the phenotype matrix  
8 comprising 2,822 traits, we utilized singular value decomposition (SVD). The effective number was  
9 determined using the squared sum of the singular values ( $s_i$ ) relative to the fourth power of their sum,  
10  $\frac{(\sum_{i=1}^p s_i^2)^2}{\sum_{i=1}^p s_i^4}$ . Independent significant SNPs, along with SNPs in LD > 0.6 (including some not in XWAS but  
11 from the 1000G dataset), were passed to positional mapping (ANNOVAR<sup>140</sup>, version 2017-01-11), eQTL  
12 mapping (with reference database: CommonMind Consortium<sup>20</sup>, GTEx v8 brain<sup>79</sup>, BRAINEAC<sup>141</sup>), and  
13 3D chromatin interaction mapping (built-in chromatin interaction data: adult cortex, fetal cortex,  
14 dorsolateral prefrontal cortex, and hippocampus<sup>142</sup>; annotate enhancer/promoter regions: E053-E082  
15 (brain)). For biological annotation, we utilized the DAVID Bioinformatics Database<sup>106</sup>  
16 (<https://david.ncifcrf.gov/home.jsp>) and SynGO (<https://syngoportal.org/>). Inputs for this annotation  
17 consisted of significant genes identified through the three functional mapping methods, with all other  
18 parameters retained as default.

19

20 H-MAGMA<sup>105</sup> uses chromatin interaction profiles to map SNPs to the closest genes. We created an  
21 annotation file for the X-chromosome according to the protocol<sup>143</sup> and applied MAGMA (v1.08) for H-  
22 MAGMA execution. While all necessary files were provided in the protocol, we made minor  
23 modifications to the R code to retain only the X-chromosome annotation.

24

## 25 **Summary data-based Mendelian randomization (SMR)**

26 The summary statistics of the XWAS and the summary statistics of eQTL analysis using CAGE whole-  
27 blood data provided by Sidorenko et al.<sup>44</sup> were utilized in the SMR analysis. The genetic data in XWAS  
28 was used as a reference for LD estimation. There were 1,639 probes for genes in the NPR of the X-  
29 chromosome, and significant trait-gene pairs were identified by controlling FDR at 0.05 level. The  
30 significance indicates that the gene expression level may have a causal effect on the trait. Then we did the  
31 HEterogeneity In Dependent Instrument (HEIDI) test to distinguish the pleiotropy of causal SNPs from  
32 linkage for the significant trait-gene pairs. A non-significant result at the nominal level (p-value > 0.05)  
33 corresponds to no linkage effect and, thus, pleiotropy.

1

## 2 **Sex differences in genetic effect**

3 The sex difference in genetic effect of each NPR SNP was tested by a two-sided z-test. The null  
4 hypothesis is  $H_0: \beta_m = \beta_f$ , where  $\beta_m$  and  $\beta_f$  are true per-allele genetic effects for males and females,  
5 respectively. We coded males  $\{0, 2\}$  for a full DC trait, and  $\{0, 1\}$  for a no DC trait while always coded  
6 females  $\{0, 1, 2\}$ . The test statistic was

$$7 \quad z = \frac{b_m - b_f}{\sqrt{se_m^2 + se_f^2}}$$

8 regardless of assumption of DC, where  $b$  is a genetic effect estimate,  $se$  is the corresponding standard  
9 error. Both  $b$  and  $se$  were adjusted for each sex's trait standard deviation, which was determined by the  
10 square root of the phenotypic variance. This was achieved by dividing the original SNP effect size and its  
11 standard error by the trait's standard deviation.

12

## 13 **Differences in genetic profiles between subjects classified by phenotypic quantiles**

14 We initially segregated the data by sex due to significant confounding effects from sex-related phenotypic  
15 differences. For every trait, we calculated both the upper and lower 10th percentile scores. Using these  
16 scores, we then selected subjects based on their quantile rankings. For instance, with a specific set of traits  
17 (e.g., RBV), if a subject's scores for over 25% of the traits surpassed the upper 10th percentile for those  
18 traits, that subject was categorized into the "upper outlier" group. Conversely, if a subject's scores for  
19 more than 25% of the traits fell below the lower 10th percentile, they were placed in the "lower outlier"  
20 group. We then extracted the genetic profiles of these subjects using PLINK2 (--geno-counts). Male  
21 genetic profiles were coded as 0 or 2, while female profiles were coded as 0, 1, or 2. We employed  
22 Fisher's exact test to compare genetic profiles between the "upper outlier" and "lower outlier" groups for  
23 each sex.

24

## 25 **FIGURE LEGENDS**

26 **Figure 1: Overview of the study design.** This study encompasses four main components: dosage  
27 compensation (DC), association analysis, sex-stratified analysis, and genetic and biological annotation.  
28 The unique challenge with X-chromosome analyses arises from the coding scheme uncertainty for males,  
29 rooted in the DC in females. We first identified the DC for each trait and established a comprehensive DC  
30 atlas for each trait set. Using this atlas, we undertook association analysis across 2,822 complex brain  
31 imaging traits. Through genetic and biological annotation, we bridged the association signals with other  
32 brain-related disorders and traits linked to sex hormones. In the sex-stratified analysis, we delved into the

1 disparities in phenotype, phenotypic variance, X-linked heritability, and genetic associations between  
2 sexes.

3

4 **Figure 2: Distribution of DC and patterns of heritability in DC groups and trait sets.**

5 A) Distribution of the three DC groups across each trait set. B) Analysis of heritability attributed to the X-  
6 chromosome ( $h_X^2$ ) among DC groups. The p-values are derived from pairwise comparisons through the  
7 Wilcoxon rank sum test. C) Examination of heritability contributed by autosomes ( $h_a^2$ ) among DC groups.  
8 The p-values are sourced from pairwise comparisons via the Wilcoxon rank sum test. D)-E) Scatter plots  
9 display  $h_X^2$  for individual traits in sMRI, DTI, and fMRI, respectively. Different trait sets are color-coded,  
10 with traits having notable  $h_X^2$  represented as filled circles. The average  $h_X^2$  for significant traits is  
11 highlighted in its respective color.

12

13 **Figure 3: Atlases of DC for CT and MO (tract-mean) and fMRI G360 traits.** A) DC atlas for CT: the  
14 left side showcases the left hemisphere while the right side displays the right hemisphere. Regions of  
15 Interest (ROIs) favoring no DC are annotated. B) DC Atlas for tract-mean characteristics assessed by  
16 MO, presented in six perspectives. The sequence from left to right, top to bottom includes superior,  
17 anterior, left, interior, posterior, and right views. Tracts that favor no DC are highlighted. “SFO” is in  
18 parenthesis since it is blocked by other tracts. C) DC Atlas for fMRI G360 traits: The upper triangle  
19 illustrates rfMRI, whereas the lower triangle depicts tfMRI. The diagonal, extending from the bottom left  
20 to the top right, divides into two sections—the upper triangle portrays DC for rfMRI intra-network  
21 connectivity and the lower for tfMRI. Cells on the left margin represent DC amplitude traits for rfMRI,  
22 while those at the bottom indicate DC amplitude traits for tfMRI.

23

24 **Figure 4: Genomic loci associated with complex brain imaging traits identified in sex-agnostic**  
25 **association analysis.** Ideogram illustrating the genomic regions affecting brain imaging traits. Each trait  
26 is represented by a unique color, with the corresponding genomic region labeled directly on the ideogram.  
27 DTI PC traits follow the naming convention “metrics\_tract\_PC”, while DTI trait-mean traits are denoted  
28 as “metrics\_tract”. The term “metrics\_Average” refers to the comprehensive average trait for a metric,  
29 which is derived from the average of all voxels across all tracts.

30

31 **Figure 5: Selected genetic loci with important colocalizations in sex-agnostic association analysis.**

32 The top lead SNP, defined as the SNP with the lowest p-value in its locus, surpasses the  
33  $5 \times 10^{-8}$  threshold after adjusting for multiple comparisons using wild bootstrap. However, the p-values  
34 shown in the figure remain unadjusted. The top lead SNP along with all the SNPs in LD ( $r^2 > 0.6$ ) in the

1 same locus are the targets for XWAS results lookup in the NHGRI-EBI GWAS catalog (2023.06). A) The  
2 volume of the right ventral diencephalon exhibits shared genetic links with educational attainment and  
3 schizophrenia, pinpointed at an Xq13.1 locus by rs2361468. B) The tract-mean trait of the Superior  
4 corona radiata, as assessed by MO, shares a genetic foundation with testosterone levels, identified at an  
5 Xq28 locus via rs67596711. C) A shared genetic influence was identified between the volume of  
6 cerebrospinal fluid and sex hormone-binding globulin (SHBG), situated at an Xp11.4 locus indexed by  
7 rs35318931.

8

9 **Figure 6: Genomic loci associated with complex brain imaging traits identified in sex-stratified**  
10 **association analysis.** Ideogram depicting genomic regions influencing brain imaging traits. Each trait is  
11 distinguished by a unique color, with the name of each genomic region clearly marked on the ideogram.  
12 Indicators "Yes" and "No" specify whether the same locus was pinpointed in sex-agnostic association  
13 analysis. DTI PC traits follow the naming format “metrics\_tract\_PC”, while DTI trait-mean traits adhere  
14 to “metrics\_tract”. The term “metrics\_Average” signifies an overall-average trait for a metric that  
15 encompasses the average across all voxels and tracts. For the naming convention of ICA traits, please  
16 refer to Table S1. The label “Language (amplitude)” denotes a rfMRI G360 trait measuring the mean  
17 amplitude of the language network. “CO-DA” stands for a rfMRI G360 trait that captures the functional  
18 connectivity between the cingulo-opercular and dorsal-attention networks. A) represents male-specific  
19 associations, while B) indicates female-specific associations.



1 **Table 1: Newly identified trait-locus pairs for complex brain imaging traits in sex-agnostic analysis.** The trait-locus pairs were  
2 compared with results on the NHGRI-EBI GWAS catalog (2023.06). The raw p-values are adjusted by using wild bootstrap. The physical  
3 locations of loci are according to GRCh37 release 13.

| Trait                         | UniqID           | RsID        | p-Value  | p-Value (adj) | Start     | End       | Region |
|-------------------------------|------------------|-------------|----------|---------------|-----------|-----------|--------|
| BV of cerebrospinal fluid     | 23:38009121:A:G  | rs35318931  | 6.71E-12 | 3.82E-10      | 37933437  | 38017972  | Xp11.4 |
| BV of thalamus proper (left)  | 23:28140326:A:G  | rs2131673   | 4.69E-14 | 4.51E-12      | 28033828  | 28284470  | Xp21.3 |
| BV of thalamus proper (right) | 23:28140326:A:G  | rs2131673   | 1.99E-13 | 2.8E-11       | 28033828  | 28284470  | Xp21.3 |
| BV of ventral DC (right)      | 23:68377485:A:G  | rs2361468   | 4.22E-11 | 4.74E-08      | 68354618  | 68384580  | Xq13.1 |
| Total SA (left)               | 23:154740180:A:G | rs76536573  | 3.09E-13 | 4.85E-11      | 153732991 | 154949953 | Xq28   |
| Total SA (right)              | 23:154678628:C:G | rs28880039  | 1.13E-11 | 4.32E-09      | 153732991 | 154949953 | Xq28   |
| SA of supramarginal (left)    | 23:136505579:C:T | rs2743914   | 8.02E-15 | 4.82E-13      | 136471150 | 137073809 | Xq26.3 |
| SA of supramarginal (right)   | 23:136500146:A:G | rs2840674   | 4.65E-12 | 1.43E-09      | 136450688 | 136841801 | Xq26.3 |
| PTR (AD PC3)                  | 23:154740180:A:G | rs76536573  | 5.57E-13 | 7.18E-13      | 154379088 | 154972517 | Xq28   |
| SCR (AD PC1)                  | 23:152590165:C:G | rs5970442   | 1.41E-12 | 3.23E-10      | 152576561 | 152656246 | Xq28   |
| BCC (RD PC2)                  | 23:39464147:C:T  | rs7888246   | 4.66E-12 | 1.43E-09      | 39383773  | 39494923  | Xp11.4 |
| PLIC (MO PC4)                 | 23:150542930:G:T | rs201850695 | 1.1E-13  | 5.5E-14       | 150497978 | 150614462 | Xq28   |
| PLIC (MO PC5)                 | 23:150514840:C:T | rs5924909   | 2.75E-10 | 1.07E-08      | 150514840 | 150614316 | Xq28   |

4

1 Figure 1

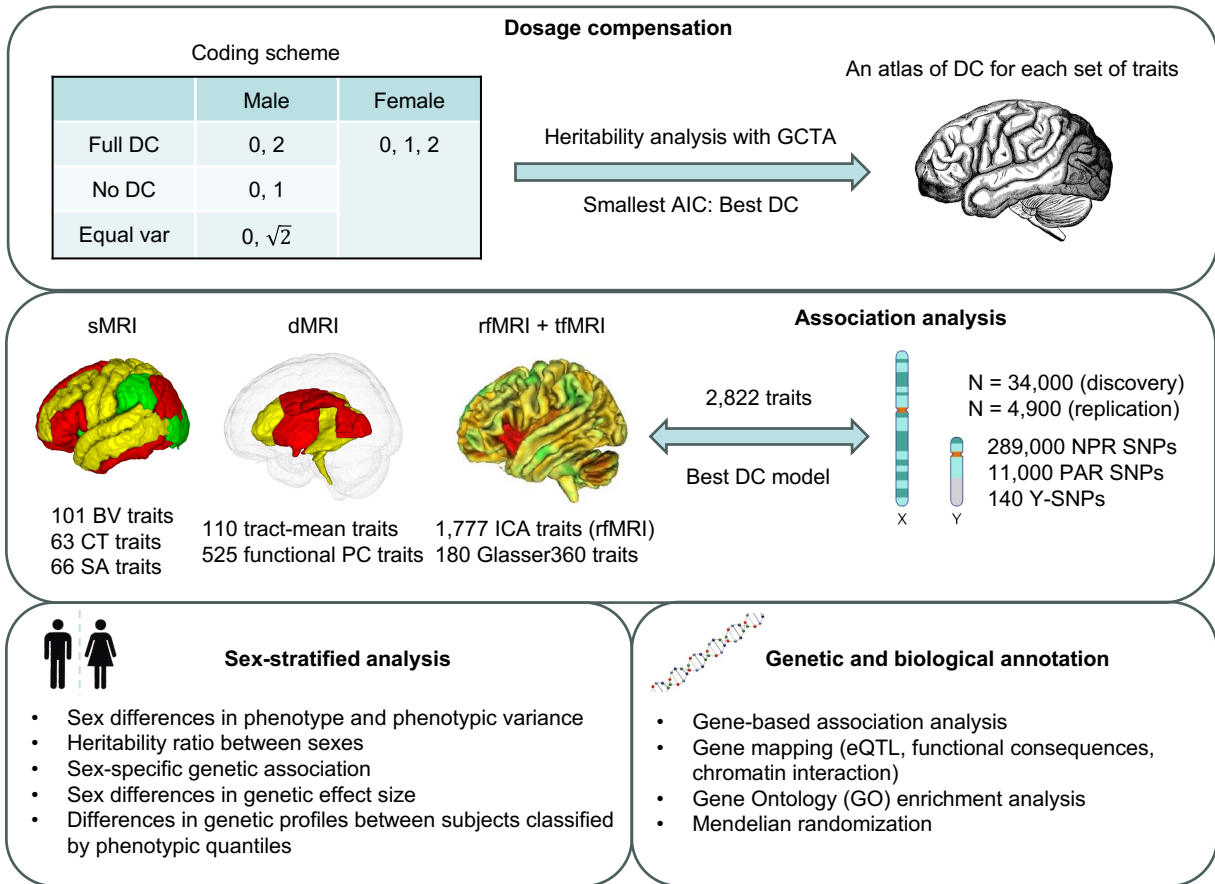

2

1 Figure 2

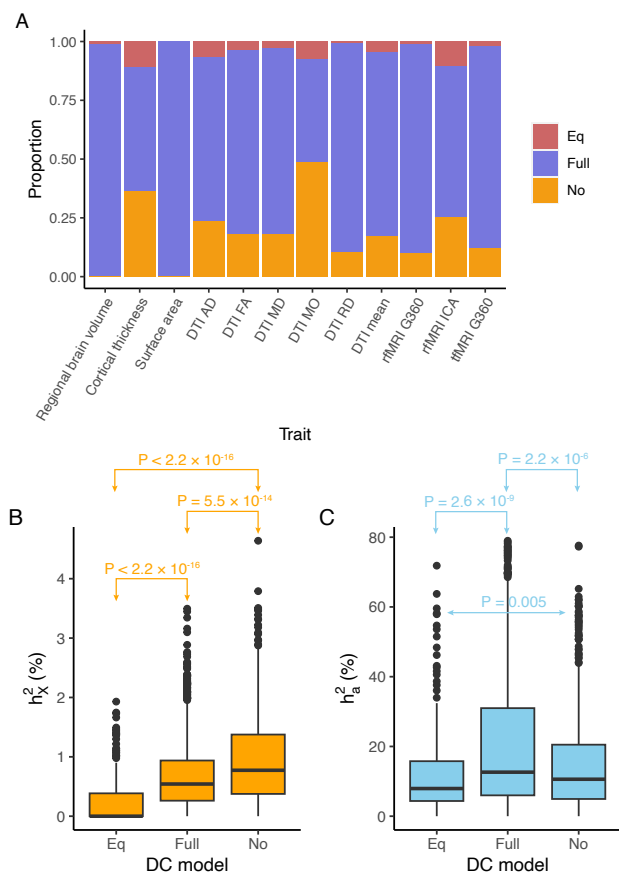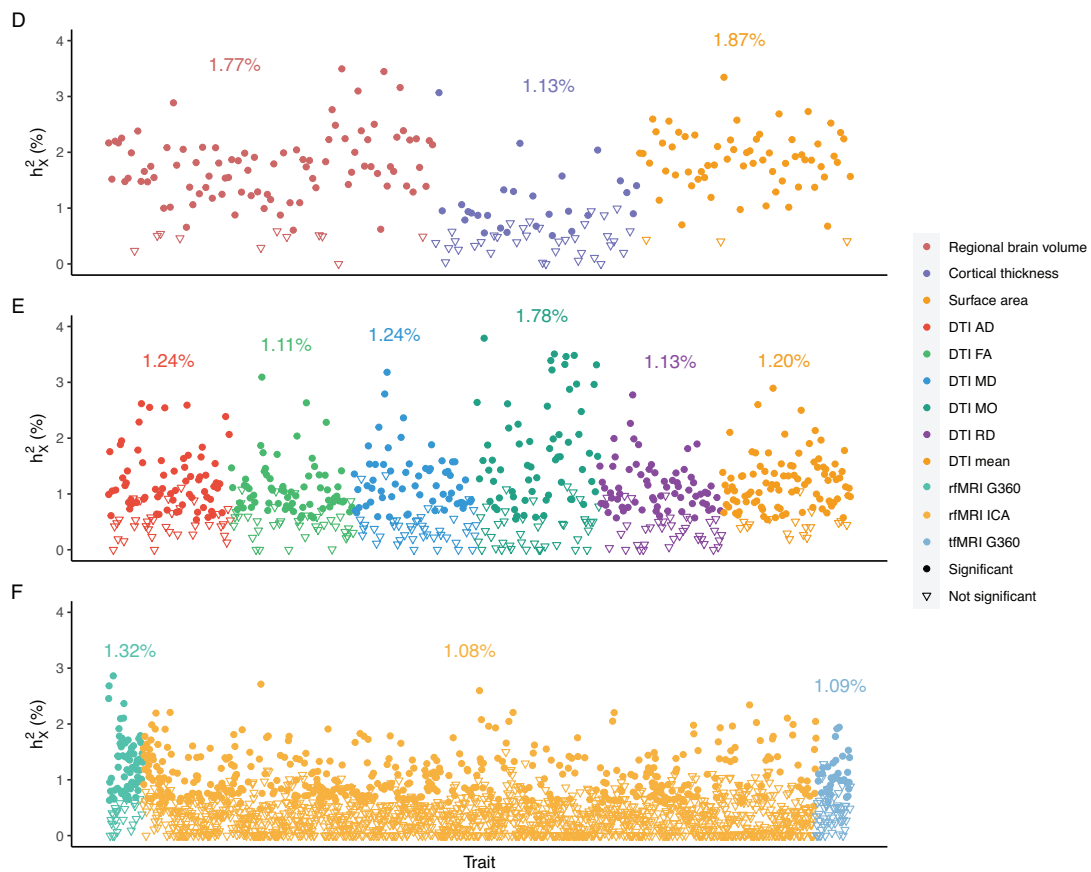

1 Figure 3

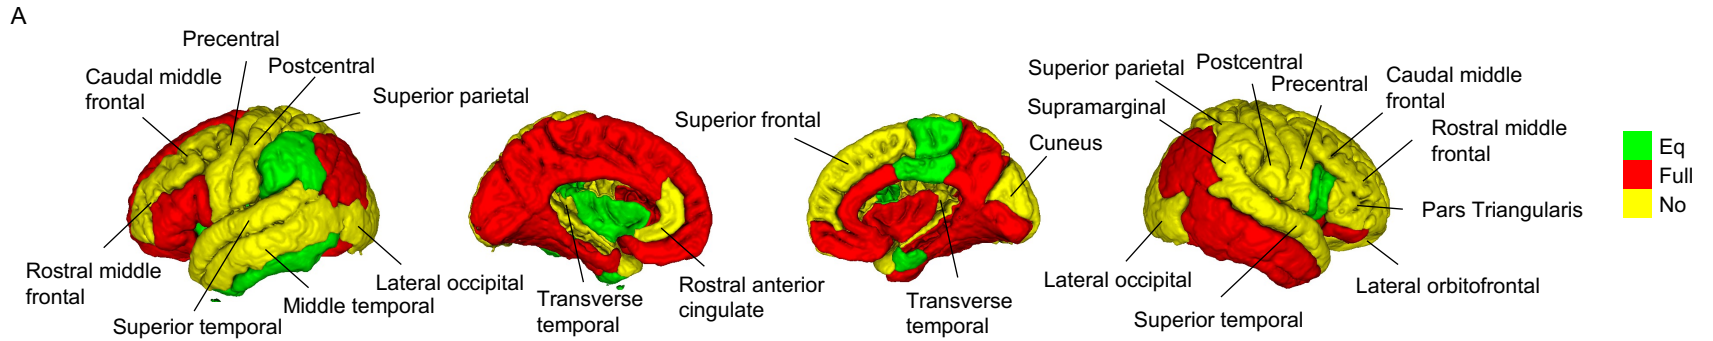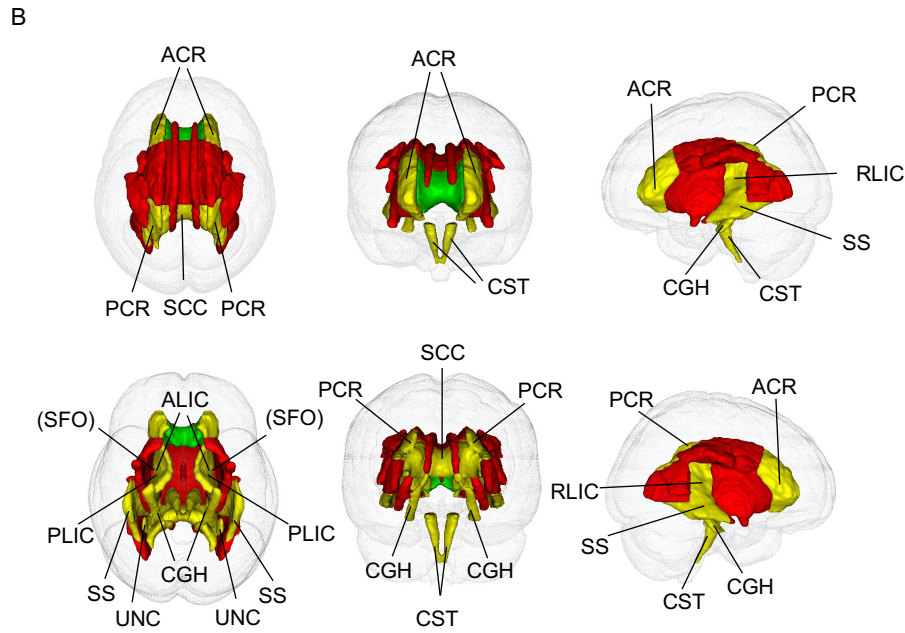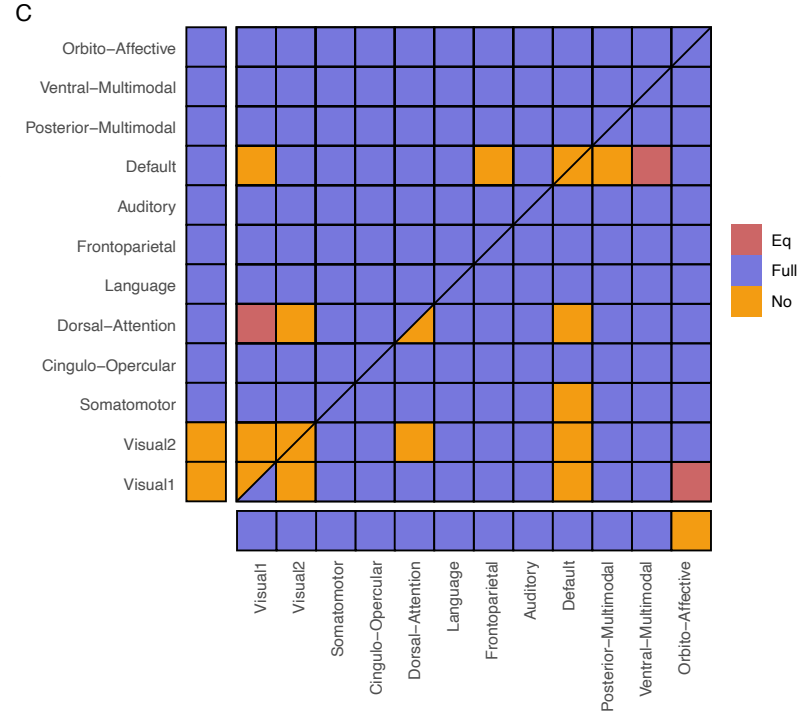

2

3

1 Figure 4

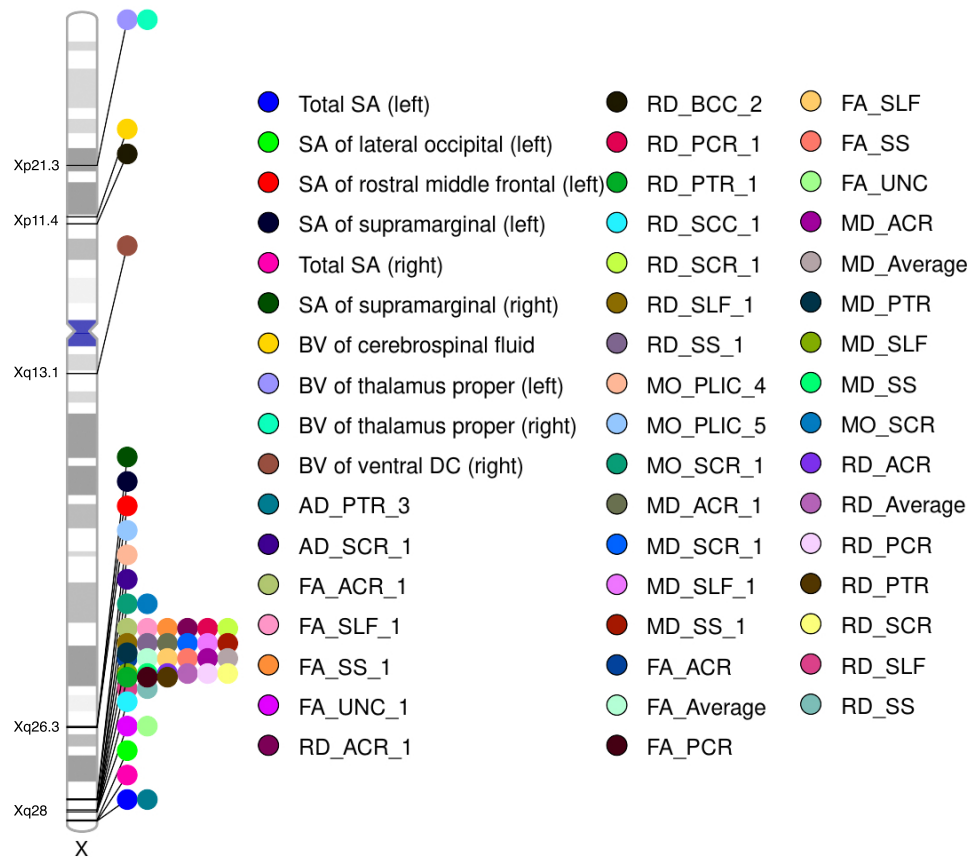

1 Figure 5

A

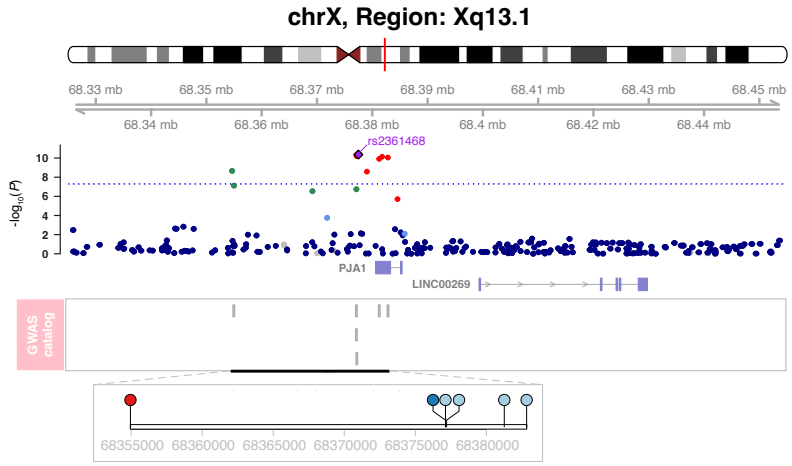

Volume of right ventral diencephalon

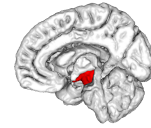

- SNP in GWAS panels
- ◆ Top SNP
  - $r^2 \geq 0.8$
  - $0.8 > r^2 \geq 0.6$
  - $0.6 > r^2 \geq 0.4$
  - $0.4 > r^2 \geq 0.2$
  - $0.2 > r^2 \geq 0$
  - .....  $P < 5 \times 10^{-8}$
- GWAS catalog
- Educational attainment
  - Neuropsychiatric disorders
  - Schizophrenia
  - Total testosterone levels
  - Bioavailable testosterone levels
  - Free testosterone levels
  - Sex hormone-binding globulin
- $L_D(r^2)$

B

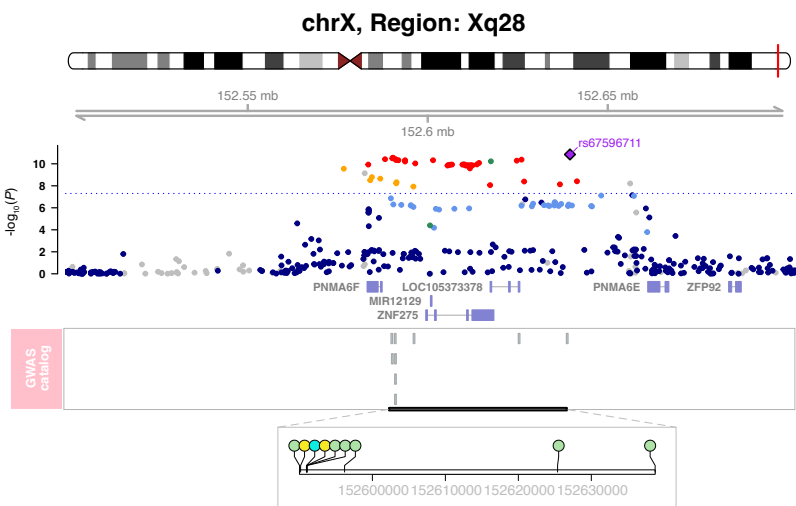

Superior corona radiata (MO)

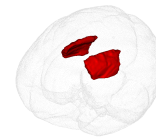

C

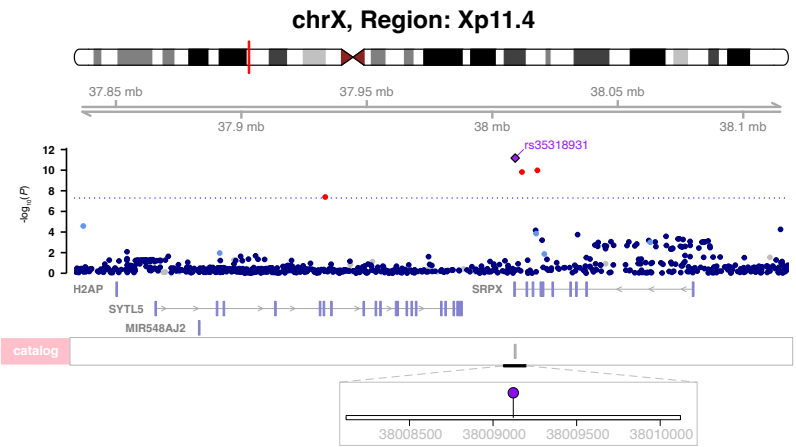

Volume of cerebrospinal fluid

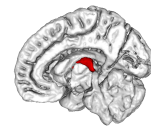



1 Figure 6

A

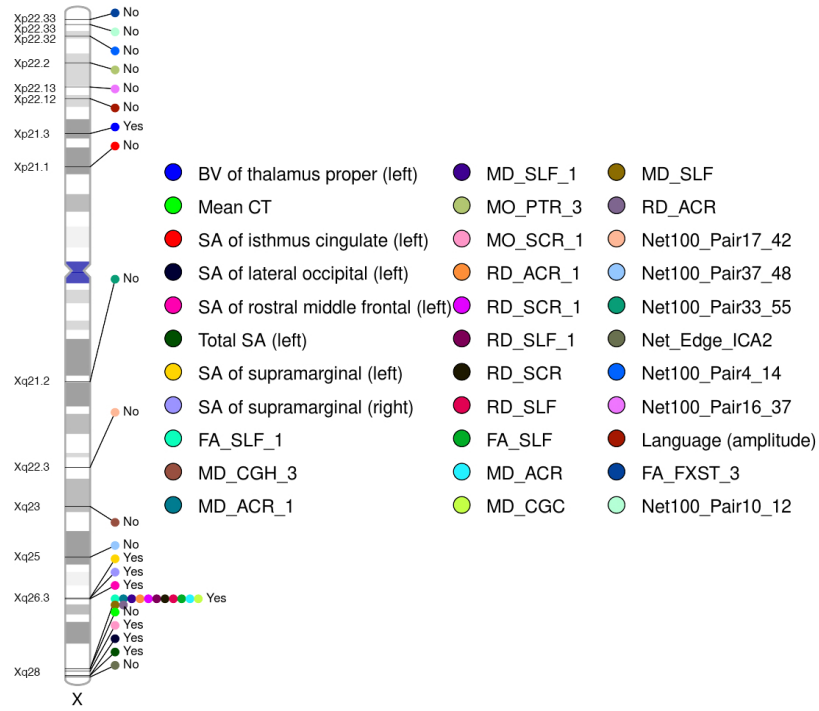

B

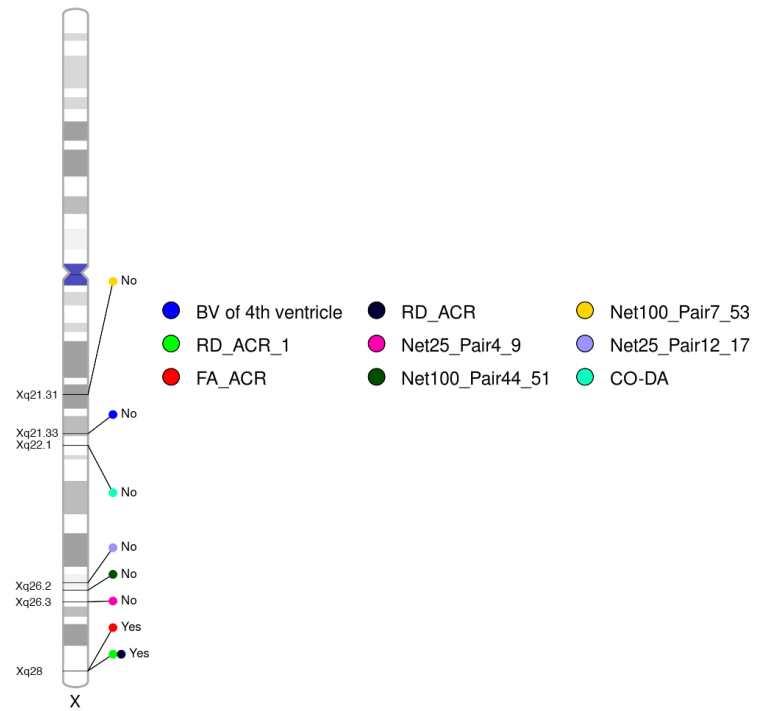

2

3
